1 **Coupling During Collective Cell Migration is Controlled by a Vinculin**  
2 **Mechanochemical Switch**

3

4 T. Curtis Shoyer<sup>1,\*</sup>, Evan M. Gates<sup>1,\*</sup>, Jolene I. Cabe<sup>2</sup>, Daniel E. Conway<sup>2</sup>, Brenton D. Hoffman<sup>1</sup>

5

6 <sup>1</sup>Biomedical Engineering, Duke University, Durham NC, USA.

7 <sup>2</sup>Biomedical Engineering, Ohio State University, Columbus, OH, USA.

8 \*These authors contributed equally.

9

10 Corresponding author: Brenton Hoffman, Department of Biomedical Engineering, Duke University,

11 Durham NC, USA, email: [brenton.hoffman@duke.edu](mailto:brenton.hoffman@duke.edu)

12 **ABSTRACT**

13  
14 Collective cell migration (CCM) plays important roles in development, physiological, and pathological  
15 processes. A key feature of CCM is the dynamic mechanical coupling between cells, which enables both  
16 long-range coordination and local rearrangements. This coupling requires the ability of cell adhesions to  
17 adapt to forces. Recent efforts have identified key proteins and implicated cellular-scale mechanical  
18 properties, but how key proteins give rise to these larger-scale mechanical processes is unclear. Using  
19 force-sensitive biosensors, cell migration assays, and molecular clutch models, we sought a molecular  
20 understanding of adhesion strengthening that could bridge this gap. We found that the mechanical  
21 linker protein vinculin bears substantial loads at AJs, FAs, and in the cytoplasm during epithelial sheet  
22 migration, and we identified a switch-like residue on vinculin that regulates its conformation and loading  
23 at the AJs during CCM. In vinculin KO-rescue, this switch jointly controlled the speed and coupling  
24 length-scale of CCM, which suggested changes in adhesion-based friction. To test this, we developed  
25 molecularly detailed friction clutch models of the FA and AJ. They show that open, loaded vinculin  
26 increases friction in adhesive structures, with larger effects observed in AJs. Thus, this work elucidates  
27 how load-bearing linker proteins can be regulated to alter mechanical properties of cells and enable  
28 rapid tuning of mechanical coupling in CCM.

## 29 INTRODUCTION

30

31 The coordinated movements of groups of cells, termed collective cell migration (CCM), play important  
32 roles in many development, physiological and pathological processes, including tissue morphogenesis,  
33 wound healing, and the progression of cancer<sup>1</sup>. CCM is distinguished from single cell migration by the  
34 presence of adhesive contacts between cells. The types of cell-cell adhesion, and the associated coupling  
35 across many cells, are often used to define the various modes of CCM, which range from weakly-coupled  
36 neural crest cells undergoing streaming migration to the strongly-coupled epithelial cells undergoing  
37 sheet migration<sup>2-4</sup>. The differences between systems are thought to be due to expression of distinct sets  
38 of cell-adhesion receptors, such as the cadherin-switch associated with full and partial epithelial-  
39 mesenchymal transitions<sup>3,5</sup>. In contrast, the molecular-scale processes enabling rapid tuning of coupling  
40 within a given migration type are not as well-understood. This tuning is particularly important in the  
41 case of epithelial sheet migration, where the rapid alteration in coupling enables both the long-scale  
42 organization of large groups of cells while also permitting local cellular rearrangements required for  
43 efficient migration and avoidance of obstacles<sup>6</sup>.

44

45 Recent advances in the understanding of CCM have been driven by both screening-based approaches  
46 and mechanistic studies, which have identified key roles for many adhesive, scaffolding, and force-  
47 generating proteins, as well as physical models focusing on key cellular-scale mechanical properties,  
48 such as cell friction, polarity, and force-generation<sup>7-9</sup>. However, how these key proteins give rise to  
49 larger-scale mechanical processes is unclear. Interestingly, the process of adhesion strengthening, where  
50 force-application results in the strengthen of adhesion structures through the stabilization of key  
51 linkages and/or the recruitment of more linkages, has been implicated in both modeling and screening  
52 efforts.

53

54 We sought to determine if a molecular-scale, physical understanding of adhesion strengthening could  
55 elucidate the connections between key molecular players, cell-scale mechanical properties, and the  
56 regulation of epithelial cell coupling during CCM. To do so, we focused on the mechanical linker protein  
57 vinculin, as it is shown to be involved in CCM-associated processes, such as embryogenesis<sup>10,11</sup>.

58 Furthermore, vinculin is also a key mediator of adhesion strengthening in two distinct ways. First, in  
59 response to force application, vinculin is recruited to the structures that link cells to the surrounding  
60 extracellular matrix (ECM), termed focal adhesions (FAs), as well as the structures that mediate linkages  
61 between neighboring cells, termed adherens junctions (AJs)<sup>12-15</sup>. Additionally, vinculin is amongst the  
62 strongest known catch-slip bonds, which exhibit increased binding lifetime in response to applied loads  
63 before eventually failing<sup>16</sup>.

64

65 Consistent with a role as a mediator of coupling during CCM, we find that vinculin bears substantial load  
66 at AJs, FAs, and throughout the cytoplasm during epithelial sheet migration. Furthermore, we identify a  
67 key residue, S1033, whose mutation affects the ability of vinculin to transition between inactive,  
68 unloadable and active, loadable states within the AJs and cytoplasm. Rescue of vinculin KO cells with WT,  
69 phosphomimetic (1033D), or unphosphorylatable (1033A) vinculin results in the modulation of cell  
70 speed and tuning of coupling, as measured by the length scale of correlated motion during CCM.  
71 Notably, these results are consistent with recent mechanical models of CCM, where variation in  
72 adhesion-based friction leads to covarying changes in cell speed and coordination. To assess the  
73 relationship between vinculin activation, vinculin load, and friction in adhesion structures, we created  
74 molecularly detailed frictional clutch models that relate force-sensitive binding dynamics of key  
75 components of AJs and FAs to the friction at each structure. Analyses reveal that increases in vinculin

76 activation and load lead to increased friction, and these effects are stronger at AJs than FAs. Thus, this  
77 work reveals a novel regulatory switch that regulates the mechanical functions of vinculin to alter cell  
78 adhesion-based friction to enable the rapid tuning of coupling during CCM.  
79

## 80 RESULTS

81

### 82 Vinculin is Loaded and Conformationally Open at the Edge of Collectively Migrating Cells

83

84 Key aspects of vinculin function are determined by the mechanical loads its experiences and its  
85 conformation<sup>17</sup>. Previous work in single cells has shown that load bearing and conformation regulation  
86 are separable<sup>13</sup>. Therefore, we sought to probe vinculin load and conformation during CCM. To do so,  
87 we developed a simple system of collective cell migration where the characteristics of vinculin loading  
88 and conformation could be readily observed. As has been done previously, we created radially  
89 expanding cell sheets using a cell droplet-based assay with Madin–Darby canine kidney (MDCK)  
90 epithelial cells (Extended Data Fig. 1a-c). As multiple MDCK strains have commonly been used in studies  
91 of epithelial dynamics<sup>18</sup>, we assessed both MDCK II and Parental MDCK cells. We verified that sheet  
92 expansion was primarily driven by migration, as reduction of cell proliferation with Actinomycin D  
93 caused no changes in dynamics (Extended Data Fig. 1d-e). To assess vinculin loading and conformation,  
94 we expressed either a FRET-based vinculin tension sensor (VinTS) or vinculin conformation sensor  
95 (VinCS) in each cell line<sup>13,19</sup>. All constructs produced stable proteins with the expected molecular weights  
96 (Extended Data Fig. 1f) and localized as expected to FAs and AJs in both cell types (Extended Data Fig. 1i,  
97 Fig. 1, and Extended Data Fig. 3). Over-expression of VinTS or VinCS did not alter migration dynamics or  
98 FA morphology in either cell line (Extended Data Fig. 1g-h). To interpret VinTS in this system, we verified  
99 that the cytosolic tension sensor module (TSMoD) reported FRET efficiencies (~0.29) consistent with no  
100 mechanical loading<sup>20</sup> (Extended Data Fig. 2a-b). Similarly, to interpret VinCS, we established a reference  
101 for the closed state by measuring the FRET efficiency of VinCS in single cells non-specifically adhered to  
102 poly-L-lysine surfaces (Extended Data Fig 2c-d), a condition in which vinculin is predominantly cytosolic  
103 and unloaded<sup>13</sup>. Together, these data demonstrated that this system was sufficient for probing vinculin  
104 loading and conformation during collective cell migration.  
105

106 In confluent cells, vinculin exchanges between three sub-cellular compartments, the FAs, AJs, and  
107 cytoplasm, in a force-sensitive manner<sup>21,22</sup>. To probe the loads experienced by vinculin in these three  
108 compartments during CCM, we imaged VinTS-expressing MDCK cells at the leading edge of expanding  
109 epithelial sheets in the basal or apical plane. We employed standard image segmentation techniques to  
110 separate signals from the adhesion structures and cytoplasm in both focal planes. As the cytoplasmic  
111 signals were similar, we focused on the apical plane due to higher signal to noise in this compartment.  
112 Vinculin experiences the largest loads in the FAs, and lower, but substantial loading was observed in AJs  
113 and the cytoplasm in MDCK II (Fig. 1a-c) as well as Parental MDCK cells (Extended Data Fig. 3a-c). To  
114 determine if vinculin loading was dependent on interactions with F-actin, we used VinTS-I997A. This  
115 point mutation strongly disrupts actin binding while maintaining the ability of vinculin to undergo  
116 conformational regulation, and VinTS-I997A has been shown to not bear detectable loads in the FAs of  
117 single cells<sup>23-25</sup>. This resulted in the reduction of vinculin load in all compartments in both cell types  
118 (Extended Data Fig. 4), establishing that forces are transmitted through F-actin to vinculin in all  
119 compartments during CCM. Furthermore, we used STED imaging to confirm the existence of a  
120 cytoplasmic actin network in both MDCK cell types (Extended Data Fig. 5a-b). We also observed  
121 comparable loading of VinTS at the AJs and in the cytoplasm using confocal microscopy (Extended Data



122 Fig. 5c-e), demonstrating that the VinTS signal at the AJs and in the cytoplasm were not due to out-of-  
123 plane optical effects from other sub-cellular structures.

124  
125 As the exchange of vinculin between compartments is associated with conformation changes, we also  
126 probed vinculin conformation in the FAs, AJs, and cytoplasm during CCM using MDCK cells stably  
127 expressing VinCS and the sheet expansion assay. Vinculin was the most open in FAs, and smaller, but  
128 substantial, portions of vinculin was open in both the AJs and in the cytoplasm (Fig. 1d-f). FRET efficiency  
129 was highest in the cytoplasm but still significantly less than the closed reference, demonstrating the  
130 existence of a cytoplasmic population of open vinculin, which further supported a role for vinculin  
131 mediating mechanical connectivity in the cytoplasmic actin network. We found a similar trend in  
132 Parental MDCK cells (Extended Data Fig. 3d-f).

133  
134 Taken together, the VinTS and VinCS data demonstrate that vinculin is loaded and conformationally  
135 open in the FAs, AJs, and the cytoplasm, but to varying degrees in each compartment. This suggests that  
136 vinculin facilitates differential mechanical connectivity of key load-bearing sub-cellular structures within  
137 and between cells during CCM.

### 138 139 **Vinculin S1033 mediates a regulatory switch that affects Vinculin Load and Conformation in** 140 **Collectively Migrating Edges**

141  
142 Previous work has shown that the phosphorylation state of vinculin affects its mechanical functions<sup>17</sup>.  
143 Therefore, we sought to determine if vinculin phosphorylation contributed to distinct loading and  
144 conformation observed in the various sub-cellular compartments. Trends for vinculin loading at FA, AJ,  
145 and cytoplasm were similar for the two MDCK variants, so we performed these experiments with one  
146 variant, Parental MDCK. First, we verified that paraformaldehyde fixation did not affect the FRET  
147 efficiency of VinTS (Extended Data Fig. 5f), consistent with previous reports<sup>20</sup>. Use of VinCS in the same  
148 condition required a normalization approach, which yielded similar levels to live monolayers at all sub-  
149 cellular compartments (Extended Data Fig. 5g-h). Together, these data demonstrated that this system  
150 was sufficient for screening the effect of inhibitors and mutations on vinculin loading and conformation.

151  
152 We first focused on how Src and Abl mediated phosphorylation of vinculin affected VinTS loading during  
153 CCM<sup>21,26</sup>. Inhibition of Src or Abl did not affect VinTS FRET efficiency at FAs, AJs, or the cytoplasm  
154 (Extended Data Fig. 6a-e). As phosphorylation at Y822 by Abl has been shown to affect vinculin  
155 mechanical function at the AJs of confluent epithelial cells, we also investigated the non-  
156 phosphorylatable point mutant (VinTS-Y822F)<sup>21</sup>. Consistent with inhibitor studies, VinTS and VinTS-  
157 Y882F exhibited identical localization and loading in collectively migrating Parental MDCK cells  
158 (Extended Data Fig. 6f-h).

159  
160 Vinculin is also phosphorylated at S1033, and expression of non-phosphorylatable (S1033A) and  
161 phosphomimetic (S1033D) mutations affects the stiffness and traction force generation of fibroblasts<sup>27</sup>.  
162 To assess the effects of these mutations on vinculin loading during CCM, we incorporated these  
163 mutations in VinTS, creating VinTS-1033A and VinTS-1033D, stably expressed these sensors in Parental  
164 MDCKs, and performed sheet expansion assays. During CCM, both variants localized to FAs, AJs, and the  
165 cytoplasm. VinTS and the non-phosphorylatable VinTS-S1033A exhibit similar loading in all  
166 compartments (Fig. 2a-b,d and Extended Data Fig. 7a-b,d). In contrast, the phosphomimic VinTS-S1033D  
167 exhibited drastically increased FRET efficiency at the AJs and in the cytoplasm compared to VinTS (Fig.  
168 2c-d), consistent with an apparent loss of loading. In FAs, VinTS-S1033D reported a partial loss of

169 loading, suggesting a less-dominant regulatory role for 1033 phosphorylation in this compartment  
170 (Extended Data Fig. 7g-h).

171  
172 Vinculin phosphorylation is a potent regulator of vinculin conformation<sup>17</sup>. To determine if mutation of  
173 S1033 affects the conformation of vinculin, we created VinCS variants containing S1033A or S1033D,  
174 stably expressed them in Parental MDCK cells, and performed the sheet expansion assay. The VinCS and  
175 non-phosphorylatable VinCS-S1033A exhibited identical localization and conformation in all  
176 compartments conformation (Fig. 2e-f,h and Extended Data Fig. 7e-f,h). In contrast, in AJs and the  
177 cytoplasm, the phosphomimetic mutant (S1033D) exhibited drastically higher FRET, consistent with  
178 complete closing of vinculin (Fig. 2g-h). In FAs, VinCS-S1033D reported a reduction in the amount of  
179 open vinculin, consistent with a less-dominant regulatory role for 1033 phosphorylation in this  
180 compartment (Extended Data Fig. 7g-h).

181  
182 Taken together, these data describe a regulatory switch for vinculin, where phosphorylation at S1033  
183 biases vinculin towards a closed, unloaded state. Furthermore, this switch appears dominant at AJs and  
184 within the cytoplasm, but only partially reduces load and the amount of open vinculin in FAs. Thus, the  
185 switch mediates tuning of mechanical connectivity within and between cells, although with different  
186 strengths.

### 187 **Vinculin Regulatory Switch Affects Speed and Correlation Length of Collective Cell Migration**

188  
189 Next, we sought to determine the effects of this regulatory switch for vinculin on CCM. To do so, we first  
190 created a CRISPR-KO vinculin MDCK II cell line (Extended Data Fig. 8a) and rescued these cells with  
191 Vinculin-mVenus (VinV), Vinculin-mVenus-S1033A (VinV-S1033A), or Vinculin-mVenus-S1033D (VinV-  
192 S1033D). All constructs produced stable proteins with the expected molecular weights (Extended Data  
193 Fig. 8b). Furthermore, these variants localized to FAs, AJs, and cytoplasm as expected (Extended Data  
194 Fig. 8c-e) and exhibited similar trends in FA morphology as function of distance from the leading edge as  
195 (Extended Data Fig. 8f-g) as endogenous vinculin (Extended Data Fig. 1). Expression of VinV, VinV-  
196 S1033A, or VinV-S1033D did not affect actin structures at the leading edge of monolayers (Extended Data  
197 Fig. 9a-f), and there was small (<~25%) or non-significant differences in the abundance of E-cadherin  
198 (Extended Data Fig. 9g-k), alpha-Catenin (Extended Data Fig. 9l-p), or extended alpha-Catenin (Extended  
199 Data Fig. 9r-u) at the AJs across the four cell types. Together, these data demonstrated that this system  
200 was sufficient for testing the effects of the regulatory switch for vinculin on CCM.

201  
202 To characterize CCM dynamics, we observed the migration of monolayers in a previously described  
203 barrier assay (Extended Data Fig. 10a-b) and measured velocity fields in the monolayer by optical flow  
204 constraint<sup>28,29</sup> (Fig. 3a-d). To quantify effects on CCM, we used two well-studied kinematic parameters  
205 for migrating monolayers: the speed (average velocity magnitude) and the correlation length of  
206 deviations in the lateral velocity component, which is a previously described measure of mechanical  
207 coupling<sup>30</sup>. Rescue of MDCK II vinculin CRISPR-KO cells, with VinV reduced both the average speed (Fig.  
208 3e), consistent with previous findings that vinculin knockdown increased speed<sup>8</sup>, and correlation length  
209 (Fig. 3f and Extended Data Fig. 10d). CCM of cells rescued with VinV-S1033A was comparable to those  
210 rescued with VinV, while rescue with VinV-S1033D was comparable to KO cells (Fig. 3f, Extended Data  
211 Fig. 10e). Together, these data show that the regulatory switch controlling vinculin loading and  
212 conformation determines the speed and correlation length of collectively migrating MDCK cells.

213  
214  
215

## 216 **Effect of Vinculin Regulatory Switch in Models of Molecular Friction at the FA and AJ**

217

218 We next leveraged recent modelling work to interpret the observed changes in CCM dynamics in terms  
219 of alterations in mechanical variables<sup>31</sup>. In the context of these models, a hallmark of strong adhesion-  
220 based friction in CCM is a positive relationship between correlation length and speed (Fig. 3g inset). The  
221 migration exhibited by CRISPR-KO vinculin and all the rescued MDCK II cells were found to be in this  
222 regime, both between experimental conditions (Fig. 3g) and within a given experimental conditions  
223 (Extended Data Fig. 10f). Furthermore, the lack of vinculin or the inability of vinculin to become open  
224 and loaded was consistent with a reduction in adhesion-based friction, suggesting that loaded vinculin  
225 enhances adhesion-based friction.

226

227 To probe the relationship between force-activated binding dynamics and adhesion-based friction, we  
228 used frictional clutch models (Supplementary Note 1), which predict the resistive force due to the sliding  
229 of two surfaces relative to each other at a particular speed as function of the number and properties of  
230 adhesive linkages between these surfaces<sup>32</sup>. To begin, we investigated previously developed models that  
231 contained linkages with a single simple bond type, such as an ideal bond that does not respond to force  
232 or a slip bond that weakens with force (Supplementary Note 1 Fig S2). To validate our implementation of  
233 a frictional clutch, we simulated clutches comprised of linkages with ideal or slip bonds, and we  
234 observed agreement with previous predictions of the relationship between frictional force and speed<sup>32</sup>.  
235 To gain intuition about the molecular determinants of friction, we also created a frictional clutch based  
236 on catch-slip bonds, and then compared the mean engagement lifetime and the effective friction  
237 coefficient, a standard parameter describing the frictional resistance between sliding surfaces (cell-ECM  
238 or cell-cell) in models of CCM for each scenario<sup>33</sup>. Notably, the qualitative shape of the friction  
239 coefficient-speed curve related to the individual linkage dynamics, being independent of speed for ideal  
240 bonds, monotonic decreasing for slip bonds, or biphasic for catch-slip bonds, indicating the underlying  
241 molecular-scale dynamics are indicative of the larger-scale mechanics of the frictional clutch.

242

243 To probe the effects of complex connectivity and potential regulatability of load-bearing linkages within  
244 adhesion structures, we developed multi-component linkages for use in the frictional clutch models.  
245 These multi-component linkages were based on integrin:talín:F-actin in FAs or E-cadherin:β-catenin:α-  
246 catenin:F-actin in AJs, which could be reinforced through the incorporation of vinculin. The ability these  
247 multi-component linkages to maintain connectivity under mechanical load was based on the force-  
248 dependent bond kinetics determined previously for key interfaces (Supplementary Note 1 Fig. S1). As  
249 these parameters were obtained from single molecule experiments characterizing the interfaces  
250 separately, we first assessed their suitability for use in combination to model multi-component linkages  
251 at the FA and AJ. The engagement lifetime of both linkages increased initially with loading rate and then  
252 decreased, indicating that the multi-component linkages possessed catch-slip characteristics, which  
253 were stronger for the integrin-based than cadherin-based linkage (Supplementary Note 1 Fig. S3).  
254 Furthermore, the reinforcement of the F-actin interface with vinculin did not change the overall  
255 functional form, but instead increased the lifetime of both FA and AJ linkages across a wide range of  
256 loading rates, as expected for a mechanical stabilizer. We note that these behaviors of the multi-  
257 component linkages are not readily predictable from the force-sensitive dynamics of single components,  
258 as there is no single dominant interface (Supplementary Note 1 Fig. S1).

259

260 Next, we determined the qualitative relationships between force-activated bond dynamics and larger-  
261 scale mechanics in FAs and AJs using frictional clutch models containing multi-component integrin- or  
262 cadherin-based linkages (Fig. 4a-b and Supplementary Note 1 Fig. S4-5). We represented the action of  
263 the S1033-based vinculin regulatory switch by modeling vinculin in two states. As mutation of S1033

264 affected vinculin load and conformation, but not localization to FAs/AJs, vinculin is conceptualized as  
265 either (1) closed and unloadable in FA/AJ (potentially bound to PIP2 or another unloaded component),  
266 or (2) open and loadable in FA/AJ (potentially bound to an exposed cryptic binding site in talin/ $\alpha$ -catenin  
267 and F-actin) according to its binding kinetics. In the absence of vinculin, the mean linkage engagement  
268 lifetime varied biphasic with velocity (Fig. 4c,f), resembling the stronger/weaker catch-slip behaviors we  
269 had found for individual integrin-/cadherin-linkages (Supplementary Note 1 Fig. S2). Furthermore, the  
270 effective friction coefficient-velocity relationships were also biphasic. Thus, as was observed in the  
271 simpler frictional clutch models, the multi-component linkage dynamics were predictive of the  
272 qualitative shape of the friction coefficient-speed relationships (Fig. 4d,g). Furthermore, over the range  
273 of speeds associated with epithelial sheet migration (1-30  $\mu\text{m/hr}$ ), increasing the fraction of loadable  
274 vinculin did not drastically change the functional forms of these, but did increase both the engagement  
275 lifetime and effective friction coefficient, consistent with a mechanical stabilizer. To assess the ability of  
276 the vinculin switch to tune friction, we assessed the effect of finer variations in the fraction of loadable  
277 vinculin at an intermediate speed in the range for CCM experimentally probed here (10  $\mu\text{m/hr}$ )  
278 (Fig.4e,d). In both FAs and AJs, the friction coefficient was tuned linearly by the amount of loadable  
279 vinculin, although vinculin's effect was overall higher in AJs (~4-fold increase) than in FAs (~2-fold  
280 increase) (Fig.4e, h). Similarly, the ensemble vinculin tension scaled linearly with the amount of loadable  
281 vinculin, and the prediction of higher vinculin tension at FAs versus AJs was consistent with our  
282 experimental observations of lower VinTS FRET efficiencies (high tensions) in FAs compared to AJs.

283  
284 Together, these results suggest that regulation of vinculin mechanical reinforcement increases frictional  
285 drag strongly at the cell-cell interface, and to a lesser extent at cell-ECM interface, to affect the speed  
286 and coordination of collectively migrating epithelial sheets.

287

## 288 **DISCUSSION**

289

290 Taken together, this work reveals a regulatory switch that determines the ability of vinculin to mediate  
291 mechanical connectivity within sub-cellular structures as well as the coupling between collectively  
292 migrating cells. The switch functions by toggling vinculin within AJs and the cytoplasm between closed,  
293 unloaded and open, loadable states. Reinforceable frictional clutch-based models based on force-  
294 sensitive binding dynamics of key components of AJs and FAs, show that the presence of open, loadable  
295 vinculin increases friction in adhesive structures, with larger effects observed in AJs. Previously,  
296 developed mechanical models of CCM predict that increases in adhesion-based friction drives a  
297 concomitant reduction in the speed and coupling length scale of collectively migrating cells, exactly as is  
298 observed when vinculin is locked into an open, loadable state through expression of non-  
299 phosphorylatable vinculin S1033A. Thus, this work elucidates how load-bearing proteins can be  
300 regulated to alter mechanical properties of cells to enable rapid tuning of mechanical coupling in CCM.

301

302 Several important open questions emerge from this work. First, vinculin is subject to a variety of other  
303 post-translational modifications<sup>17</sup>. For instance, previous work in confluent epithelial cells has shown  
304 that Abl-mediated phosphorylation of vinculin at Y822 was required for its localization to AJs<sup>21</sup>. This  
305 mechanism did not appear to be dominant in collectively migrating cells. Also, the S1033-based  
306 regulatory switch appeared dominant at AJs and with the cytoplasm, but had a smaller effect within FAs.  
307 These data suggest that an important question for future research is determining the kinases and  
308 phosphatases regulating vinculin in these diverse contexts, as well as their level of specificity for  
309 different compartments. Secondly, adhesion strengthening can occur through the recruitment of new  
310 linkages or the reinforcement of existing linkages. Previous work in single cells has focused on the

311 recruitment of new linkages, especially integrins<sup>34</sup>. This work demonstrates the existence, tunability, and  
312 consequences of the reinforcement-based mechanism. Therefore, another important question is how  
313 these strengthening mechanisms interact and may be regulated in a coordinated or independent  
314 fashion.

315  
316 Our work demonstrates a regulatory switch for vinculin that enables control of friction and modulation  
317 of cell coupling during migration. However, there are a plethora of mechanical linker proteins that  
318 localize to AJs and FAs to reinforce these structures and affect CCM<sup>6,35-38</sup>. Interestingly, we note that in  
319 our models of adhesion-based friction, we found that the vinculin reinforcement controlled the  
320 magnitude of linkage dynamics and frictional forces but had little effect on the functional form of these  
321 properties with respect to speed. This suggests independent control over the receptor specificity  
322 (achieved by E-cad or Integrin), functional form (achieved by the primary mechanical linker, E-  
323 cadherin:catenin complex or Intg:talín), and magnitude (achieved by secondary mechanical linker,  
324 vinculin) of force-dependent adhesion dynamics and mechanical force output of adhesion structures.  
325 Additionally, vinculin's effect was speed-dependent, which was tied to the force-sensitivity of its actin  
326 bond. Thus, an attractive hypothesis is that the large number of linker proteins could enable precise and  
327 multi-factorial regulation of cell force transmission and dynamics in diverse processes, and that different  
328 force-sensitive dynamics could be optimized for certain processes based on the associated speeds at the  
329 given interface, whether controlled by relative cell motion or by actin dynamics. The framework  
330 developed here integrating biosensors to probe the state and molecular loads on a linker protein,  
331 mathematical models connecting force-sensitive bond dynamics of the linker protein to adhesion level  
332 force transmission, and tests of the function of the linker in collective migration provide a new means  
333 for determining the relative importance of different mechanical linker proteins in specific contexts,  
334 which will likely impact a variety of future studies in mechanobiology.

335

## 336 **Methods**

337

### 338 **Generation of DNA constructs**

339 Construction of pcDNA3.1-TSMod, pcDNA3.1-VinTS, pcDNA3.1-VinV, pcDNA3.1-VinCS, and pcDNA3.1-  
340 VinTS-I997A have been described previously<sup>13,24</sup>. PCR mutagenesis was used to generate DNA constructs  
341 for the mutant of VinTS that is deficient in Y822 phosphorylation (pcDNA3.1-VinTS-Y822F), mutants of  
342 VinV, VinTS, and VinCS that are deficient in S1033 phosphorylation (pcDNA3.1-VinV-S1033A, pcDNA3.1-  
343 VinTS-S1033A, and pcDNA3.1-VinCS-S1033A), and mutants of VinV, VinTS, and VinCS that mimic  
344 phosphorylated S1033 (pcDNA3.1-VinV-S1033D, pcDNA3.1-VinTS-S1033D, and pcDNA3.1-VinCS-  
345 S1033D). For the Y822F mutant, forward primer 5'-TTGGATTCTGGATTCAGGATTCTGGG-3', reverse  
346 primer 5'-CCCAGAATCCTGAATCCAGAATCCAA-3', and template DNA pcDNA3.1-VinTS were used. For the  
347 S1033A mutants, forward primer 5'- AACCTCATGCAGGCTGTGAAGGAAACT-3', reverse primer 5'-  
348 CTGGGCGTTATGAACCAACATCTCAG-3', and template DNA pcDNA3.1-VinV, pcDNA3.1-VinTS, or  
349 pcDNA3.1-VinCS were used. For the S1033D mutants, forward primer 5'-  
350 AACCTCATGCAGGATGTGAAGGAAACT-3', reverse primer 5'- CTGGGCGTTATGAACCAACATCTCAG-3', and  
351 template pcDNA3.1-VinV, DNA pcDNA3.1-VinTS, or pcDNA3.1-VinCS were used. To create plasmids for  
352 lentiviral expression of these constructs, pcDNA3.1 plasmids were digested with NruI/XbaI and ligated  
353 into pRRL vector that had been digested with EcoRV/XbaI. All newly generated constructs were verified  
354 by DNA sequencing (Genewiz).

355

### 356 **Cell Culture and Expression of DNA constructs**



357 MDCK Parental cells (ATCC® CCL-34™, obtained from Duke University Health System's Cell Culture  
358 Facility) and MDCK II cells (generous gift from Dr. Adam Kwiatkowski, University of Pittsburgh) were  
359 maintained in a humidified 5% CO<sub>2</sub> atmosphere at 37°C in DMEM-LG (D6046; Sigma Aldrich)  
360 supplemented with 10% fetal bovine serum (HyClone), 1% antibiotic/antimycotic (Gibco), and 1 g/L  
361 sodium bicarbonate (Gibco). MDCK cell type was confirmed by probing expression for Claudin-2  
362 (expressed by MDCK II cells but not MDCK Parental cells, data not shown).

363  
364 CRISPR/Cas9-mediated knockout of vinculin in MDCK II cells was performed using a previously described  
365 guide RNA<sup>39</sup>. Knockout of vinculin was confirmed by western blot analysis.

366  
367 HEK293-T cells, used for viral production, were maintained in DMEM-HG (D5796; Sigma Aldrich)  
368 supplemented with 10% fetal bovine serum (HyClone) and 1% antibiotic/antimycotic (Gibco). For viral  
369 transduction, the second generation viral packaging plasmids psPax2 (Plasmid #12260) and pMD2.G  
370 (Plasmid #12259) were purchased from Addgene. To generate viral particles containing the DNA for a  
371 desired construct, the corresponding pRRL-based construct, psPax2, and pMD2G plasmids were  
372 transfected into HEK293-T cells using Lipofectamine 2000 (Invitrogen) according to the manufacturer's  
373 protocol. After 4 hours, the transfection mixture was exchanged for complete growth media. After an  
374 additional 72 hours, media containing viral particles was harvested and stored at -80°C. One day prior to  
375 viral transduction, MDCK cells were plated in 6-well dishes at a density of approximately 100,000 cells  
376 per dish. Cells were transduced with 500 µL of viral particle containing growth media supplemented with  
377 2 µg/mL Polybrene (Sigma Aldrich) to enhance viral uptake. After three passages, transduced cells were  
378 sorted via fluorescence activated cell sorting (FACS) based on the intensity of the fluorescent signal of  
379 the construct. For expression of FRET sensors in Parental MDCK and MDCK II cells, expression levels  
380 were selected that yielded sufficient signal-to-noise in FRET measurements and did not affect cell  
381 migration or FA morphology. For rescue of MDCK II Vcl KO cells with VinV constructs, expression levels  
382 were selected that localized to FAs, AJs, and cytoplasm as expected.

### 383 384 **Droplet-based Migration Assay**

385 To create cell adherent surfaces appropriate for imaging, glass bottom dishes (World Precision  
386 Instruments) or no. 1.5 glass coverslips mounted in reusable metal dishes (Bioprotechs, Butler, PA) were  
387 incubated with 10 µg/ml fibronectin (Fisher Scientific) in PBS at room temperature for 1 hour, rinsed  
388 once with PBS, and allowed to dry prior to cell seeding. Following a previously published protocol to  
389 create collectively migrating cell islands<sup>40</sup>, approximately 5x10<sup>3</sup> cells suspended in 5 µL growth medium  
390 were plated as a droplet on the fibronectin-coated glass bottom cell culture dishes. Cells adhered for 30  
391 minutes at 37°C and 5% CO<sub>2</sub>, and then the dish was filled with 2 mL growth medium. Cells were  
392 incubated for 72 hours at 37°C and 5% CO<sub>2</sub> to enable formation of a mechanically integrated and  
393 collectively migrating cellular layer. In the droplet assay, all experiments were conducted at 72 hr post-  
394 seeding, except for area expansion, which was quantified between 48 and 72 hr post-seeding.

395  
396 To quantify migration in the droplet assay, cell islands were imaged at 48 and 72hrs using phase  
397 microscopy with a 10x objective (UPlan FLN/NA0.3 10x Objective, Olympus) on an Olympus inverted  
398 fluorescent microscope (Olympus IX83, Tokyo, Japan) equipped with a sCMOS ORCA-Flash4.0 V2 camera  
399 (Hamamatsu Photonics, Hamamatsu, Japan). After establishing Köhler illumination, a fixed grid of  
400 images was acquired using Metamorph acquisition software (Olympus). For each sample, images were  
401 stitched together using the ImageJ Grid/Collection stitching plugin. Island size was then manually  
402 measured in ImageJ. Briefly, background was subtracted using the Subtract Background tool. The rolling  
403 ball radius was set to 75 pixels, and the resultant image was converted to a binary mask using the

404 associated built-in function. To determine the island's expansion over 24hrs, the change in area from 48  
405 to 72hrs was normalized by the initial island size at 48 hrs.

406

407 To assess the effect of proliferation in the droplet assay, monolayer expansion was compared in the  
408 absence or presence of the proliferation inhibitor Actinomycin D. Immediately following the imaging at  
409 48 hrs post-seeding, cells were treated with Actinomycin D (Sigma, Product SBR00013) at a  
410 concentration of 2 ng/mL for a duration of 8 hr. To assess levels of cell proliferation, Click-iT™ Plus EdU  
411 Alexa Fluor™ 647 Imaging Kit (Fisher Scientific) was used. At 64hrs post-seeding, cells were treated with  
412 10μM EdU for 8 hours before fixation. Detection of EdU was performed per the manufacturer's  
413 protocol.

414

#### 415 **Barrier-based Migration Assay**

416 To prepare the surface, 12-well glass bottom plates (Cellvis) were incubated with 10 μg/ml fibronectin  
417 (Fisher Scientific) in PBS at room temperature for 1 hour, rinsed once with PBS, and allowed to dry prior  
418 to cell seeding. Barrier molds (iBidi) were positioned and adhered to the 12-well glass bottom plate  
419 using a custom alignment tool. A 70μL suspension of cells was seeded at a density of 500 cells/μL into  
420 one chamber in a barrier mold. Cells grew for 14.5 hours, forming a confluent monolayer inside the  
421 barrier. Then, the barrier was lifted, at which point the cells were able to migrate into free space. After  
422 barrier removal, cells were washed immediately with PBS once and then provided media. In the barrier  
423 assay, migration kinematics and actin organization were assessed.

424

425 To quantify migration in the barrier assay, timelapse multifield imaging of migration in the barrier assay  
426 was performed using phase contrast microscopy on a Zeiss Axio Observer Z1 microscope outfitted with a  
427 Pecon XL S1 incubator regulating temperature (37°C), CO<sub>2</sub> concentration (5%), and humidity. The  
428 following objective was used: 10x/0.30 Plan-NeoFluar Ph1, (440331-9902) WD: 5.2mm. Movement of  
429 the sample (motorized XY stage), image acquisition (Photometrics CoolSNAP HQ2 CCD camera), and  
430 software-based autofocus were computer-controlled using Metamorph (Olympus) software. Imaging  
431 was started approximately 3 hours post-barrier lift and conducted for a duration of approximately 6  
432 hours. The delay between two successive images of the same field was 10 minutes. For each monolayer,  
433 a minimum of 4 fields of view located along the longer free edge of the rectangular monolayer were  
434 monitored.

435

436 MATLAB (Mathworks) was used for all image analysis. Velocity fields were computed from the timelapse  
437 images using a previous implementation of the Optical Flow Constraint method from Vig, et al.<sup>29</sup>.

438 Velocities were computed on a square grid 32 px (20.8 μm) apart at all positions inside the monolayer in  
439 the field of view. To validate velocity field computation, we simulated the motion of artificial particles  
440 subjected to the computed velocity field and overlaid the positions onto the original timelapse movie, as  
441 previously described<sup>29</sup>. To quantify migration kinematics, speed and spatial correlation length were  
442 computed for each field of view and then averaged to obtain a single value for each monolayer. Speed  
443 was defined as the magnitude of the velocity vector averaged over grid points located less than or equal  
444 to 500 μm from the leading edge, as given below:

445

$$446 \quad S(t) = \frac{1}{N} \sum_{i=1}^N \sqrt{(v_{x,i}(t))^2 + (v_{y,i}(t))^2}, \quad \forall i: \text{dist}(\vec{r}_i, L(t, x, y)) \in [0, 500] \mu\text{m}$$

447

448 where  $\vec{r}_i = \langle x_i, y_i \rangle$  is the position of grid point  $i$ ,  $\vec{v}_i(t) = \langle v_{x,i}(t), v_{y,i}(t) \rangle$  is the velocity of grid point  $i$  at  
449 timepoint  $t$ ,  $L(t, x, y)$  is the curve representing the leading edge at timepoint  $t$ , and  $\text{dist}(\vec{r}_i, L(t, x, y))$  is

450 the minimum distance between the grid position  $\vec{r}_i$  and the leading edge curve  $L(t, x, y)$ . The fixed  
 451 coordinate system is defined such that the y-direction is normal to the free edge created by the barrier  
 452 mold, and the x-direction is parallel to it. For each field of view, a time-averaged leading edge speed was  
 453 then obtained. Furthermore, as a measure of spatial correlation in the velocity field, we used the  
 454 correlation length for lateral velocity deviations, as previously described<sup>30</sup>. The lateral velocity deviation  
 455 for grid point  $i$  at timepoint  $t$ ,  $u_i(t)$ , is defined as the x component of the velocity at the grid location  
 456 minus the average of x velocity components over all grid locations in the monolayer in the field of view,  
 457 given by:  $u_i(t) = v_{x,i}(t) - \langle v_x(t) \rangle$ . The normalized spatial correlation coefficient as a function of radial  
 458 distance  $r$  at time  $t$ ,  $C(r, t)$ , was then computed using the following equation:  
 459

$$460 \quad C(r, t) = \frac{\langle u_i(t) \cdot u_j(t) \rangle}{\sqrt{\langle u_i(t)^2 \rangle \langle u_j(t)^2 \rangle}}, \quad \forall i, j: \|\vec{r}_i - \vec{r}_j\| = r \text{ and } \text{dist}(\vec{r}_i, L_t(x, y)) \in [0, 500] \mu\text{m}$$

461  
 462 Computation was performed over all grid points  $i$  located less than or equal to 500  $\mu\text{m}$  from the leading  
 463 edge, which includes most of the monolayer but keeps a constant computation window for all fields of  
 464 view, and radial distances were binned in 10  $\mu\text{m}$  bins. For each field of view, a single correlation length  
 465 was determined by plotting the time-averaged normalized correlation coefficient,  $C(r) = \langle C(r, t) \rangle$ ,  
 466 versus distance  $r$  and determining the smallest value for  $r$  such that the correlation function decays  
 467 below a threshold of 0.1. To assess relationships between speed and correlation length, the root-mean-  
 468 square lateral velocity deviation and correlation length in lateral velocity deviation from individual  
 469 timepoints were used.

#### 470 471 **Western Blot Analysis**

472 Cells were washed one in ice-cold PBS buffer and lysed in ice-cold lysis buffer [10% Glycerol, 2 mM  
 473 EDTA, 250 mM NaCl, 50mM HEPES, 0.5% NP-40, protease inhibitor cocktail (Sigma)]. Cell lysates were  
 474 centrifuged for 10 minutes at 13000 RPM and 4°C. Supernatants were separated and pellets of cell  
 475 debris were discarded. Afterwards, 2x Laemmli sample buffer (Bio-Rad Laboratories) was added to the  
 476 lysate for a 1:1 dilution and the sample was boiled at 100 °C for 5 minutes. Samples were then loaded  
 477 into Mini-PROTEAN® TGX™ Precast Gels (4-20%, Biorad) and ran at 100 V for 70 minutes before being  
 478 transferred to a PVDF membrane (Bio-Rad Laboratories) via wet-transfer. Membranes were blocked  
 479 with 5% dry milk in TBST [10 mM Tris-HCl, 100 mM NaCl, 0.1% Tween 20] for 1 hour at room  
 480 temperature and then incubated with primary antibodies per the dilution listed overnight at 4 °C.  
 481 Afterwards, the membrane was rinsed 3 times in TBST and incubated with the appropriate enzyme  
 482 conjugated secondary antibody (Life Technologies), depending on the animal species, for 1 hour at room  
 483 temperature. Membranes were then rinsed again 3 times in TBST and then developed using Supersignal  
 484 West Pico Chemiluminescent Substrate (Thermo Fisher Scientific). The signal was detected either on X-  
 485 ray film (Kodak) or by imaging (ChemiDoc Imaging System, Bio-Rad Laboratories). Primary and secondary  
 486 antibodies used for Western Blots are provided in Table 1.

487  
 488

**Table 1: Primary and Secondary Antibodies for Western Blot Analysis**

| Type      | Antibody                        | Species | Clonality  | Manufacturer  | Product | Dilution           |
|-----------|---------------------------------|---------|------------|---------------|---------|--------------------|
| Primary   | Vinculin                        | Mouse   | monoclonal | Sigma         | V91314  | 1:8000             |
| Primary   | GAPDH                           | Rabbit  | polyclonal | Santa Cruz    | sc25778 | 1:4000             |
| Primary   | GFP                             | Rabbit  | polyclonal | Abcam         | ab6556  | 1:5000             |
| Secondary | Anti-mouse IgG<br>(H+L), Cross- | Goat    | polyclonal | Thermo Fisher | G21040  | 1:3000 –<br>1:5000 |



|           |                                                                |      |            |               |        |                 |
|-----------|----------------------------------------------------------------|------|------------|---------------|--------|-----------------|
|           | Adsorbed Secondary Antibody, HRP                               |      |            |               |        |                 |
| Secondary | Anti-rabbit IgG (H+L) , Cross-Adsorbed Secondary Antibody, HRP | Goat | polyclonal | Thermo Fisher | G21234 | 1:3000 – 1:5000 |

489

#### 490 **Fixation & Immunofluorescent Staining**

491 For fixation or immunofluorescent labeling, cells were washed once with PBS (containing Ca<sup>2+</sup> and Mg<sup>2+</sup>),  
 492 fixed with 4% methanol-free (EM grade) paraformaldehyde (Electron Microscopy Sciences, Hatfield, PA)  
 493 for 10 minutes and then rinsed with PBS. For immunofluorescent labeling, cells were treated with 0.1%  
 494 Triton-X for 15 min and then rinsed with PBS. Fresh 2% bovine serum albumin (BSA, Sigma Aldrich) in  
 495 PBS was used as blocking buffer for 30 min. Primary antibody was applied for 60 min and then rinsed  
 496 three times with PBS. Cells were again blocked for 30 min. Secondary antibody was applied for 60 min.  
 497 Cells were then rinsed three times with PBS and imaged in PBS. Primary antibodies and the dilutions  
 498 used for immunofluorescent labeling are provided in Table 2. Secondary antibodies raised against the  
 499 appropriate primary species and conjugated with dyes, including Alexa Fluor 488, 594, and 647, were  
 500 purchased from Thermo Fisher and used at a dilution of 1:500. To label actin, cells were treated with  
 501 Alexa Fluor 488-, 594-, or 647-conjugated phalloidin (Invitrogen) at a 1:100 dilution during the secondary  
 502 antibody step. To label nuclei, after fixation and permeabilization, cells were rinsed in PBS and stained  
 503 with a 1:5000 dilution of 4', 6-diamidino-2-phenylindole, dihydrochloride (DAPI, Life Technologies,  
 504 D1306) in PBS for 5 min at room temperature then rinsed twice in PBS.

505

506

**Table 2: Primary Antibodies for Immunofluorescent Staining**

| Antibody                                                 | Species | Clonality  | Manufacturer   | Product | Dilution |
|----------------------------------------------------------|---------|------------|----------------|---------|----------|
| vinculin                                                 | Mouse   | monoclonal | Sigma          | V91314  | 1:500    |
| E-cadherin                                               | Rat     | monoclonal | Sigma          | U3254   | 1:500    |
| α-catenin                                                | Rabbit  | polyclonal | Cell Signaling | 3236    | 1:200    |
| α-catenin extended conformation-sensitive antibody (α18) | Rat     | monoclonal | Nagafuchi Lab* | N/A     | 1:1000   |

\*Generous gift of Dr. Akira Nagafuchi (Nara Medical University)

507

508

#### 509 **Imaging of FRET-based Sensors and Immunofluorescence**

510 An Olympus inverted fluorescent microscope (Olympus IX83, Tokyo, Japan) was used to image samples.  
 511 Images were acquired at 60x magnification (UPlanSApo 60X/NA1.35 Objective, Olympus) and  
 512 illuminated by a LambdaLS equipped with a 300W ozone-free xenon bulb (Sutter Instrument, Novato,  
 513 CA). The images were captured using a sCMOS ORCA-Flash4.0 V2 camera (Hamamatsu Photonics,  
 514 Hamamatsu, Japan). The FRET images were acquired using a custom filter set comprised of an mTFP1  
 515 excitation filter (ET450/30x; Chroma Technology Corp, Bellows Falls, VT), a mTFP1 emission filter (FF02-  
 516 485/20-25, Semrock, Rochester, NY), Venus excitation filter (ET514/10x; Chroma Technology Corp),  
 517 Venus emission filter (FF01-571/72; Semrock) and dichroic mirror (T450/514rpc; Chroma Technology  
 518 Corp). For sensitized emission FRET microscopy, three images are acquired to calculate FRET efficiency<sup>41</sup>.

519 These include imaging the acceptor (Venus excitation, Venus emission), FRET (mTFP1 excitation, Venus  
520 emission), and donor (mTFP1 excitation, mTFP1 emission). Exposure times for imaging of Venus, Teal-  
521 Venus FRET, and Teal were 1000ms, 1500ms, and 1500ms, respectively. To avoid photobleaching, only  
522 one image was taken per cellular region, either at the basal (FA's) or apical (AJ's) focal plane. For  
523 immunofluorescent imaging, we utilized the DA/FI/TR/Cy5-4X4 M-C Brightline Sedat filter set (Semrock)  
524 and the associated dichroic mirror (FF410/504/582/669-Di01). The motorized filter wheels (Lambda 10-  
525 3; Sutter Instrument), automated stage (H117EIX3; Prior Scientific, Rockland, MA), and image acquisition  
526 were controlled through MetaMorph Advanced software (Olympus). For live cell imaging, growth media  
527 was replaced with live cell visualization media (Sapphire North America, Ann Arbor, MI, MC102),  
528 supplemented with 10% FBS and 1 g/L sodium bicarbonate, 30 minutes before imaging. A constant  
529 temperature was maintained across the sample using an objective heater (Bioptechs, Butler, PA 150819-  
530 13) in conjunction with a stage and lid heater (Bioptechs Stable Z System 403-1926). A humidified CO<sub>2</sub>  
531 perfusion system (Bioptechs 130708) was used to maintain a stable pH. All components were brought to  
532 equilibrium prior to imaging.

533

### 534 **Calculation of FRET Efficiency from Sensitized Emission**

535 FRET was detected through measurement of sensitized emission<sup>42</sup> and calculated using custom written  
536 code in MATLAB (Mathworks)<sup>41</sup>. All analyses were conducted on a pixel-by-pixel basis. Prior to FRET  
537 calculations, all images were first corrected for dark current, uneven illumination, background intensity,  
538 and three-dimensional offsets caused by chromatic aberrations and minute hardware misalignments  
539 (registration) as previously described<sup>20</sup>. Spectral bleed-through coefficients were determined through  
540 FRET-imaging of cells expressing only donor or only acceptor FP. The donor bleed-through coefficient  
541 (dbt) was calculated for mTFP1 as:

542

$$543 \quad dbt = \left\langle \frac{I_f}{I_{dd}} \right\rangle$$

544

545 where  $I_f$  is the intensity in the FRET-channel,  $I_{dd}$  is the intensity in the donor-channel, and data were  
546 binned by donor-channel intensity. Similarly, the acceptor bleed-through coefficient (abt) was calculated  
547 for Venus (A206K) as:

548

$$549 \quad abt = \left\langle \frac{I_f}{I_{aa}} \right\rangle$$

550

551 where  $I_{aa}$  is the intensity in the acceptor-channel, and data were binned by acceptor-channel intensity.  
552 For the mTFP1-Venus (A206K) FP pair on our microscope setup, the cross-talk between donor and  
553 acceptor channels (signal from donor in acceptor channel and vice-versa) was determined to be  
554 negligible. To correct for spectral bleedthrough in experimental data, pixel-by-pixel FRET corrections  
555 were performed according to the equation:

556

$$557 \quad F_c = I_f - dbt * I_{dd} - abt * I_{aa}$$

558

559 where  $F_c$  is the corrected FRET image,  $I_f$  is the intensity in the FRET-channel,  $I_{dd}$  is the intensity in the  
560 donor-channel, and  $I_{aa}$  is the intensity in the acceptor-channel. After bleed-through correction, FRET  
561 efficiency was calculated. Through imaging donor-acceptor fusion constructs of differing, but constant,  
562 FRET efficiencies, it is possible to calculate two proportionality constants that enable the calculation of  
563 FRET efficiencies for any single-chain biosensor<sup>42</sup>. These proportionality constants are G:

564

565

$$G = -\frac{\Delta\left(\frac{F_c}{I_{aa}}\right)}{\Delta\left(\frac{I_{dd}}{I_{aa}}\right)}$$

566

567 where  $\Delta$  indicates the change between two donor-acceptor fusion proteins, and k:

568

569

$$k = \frac{I_{dd} + \frac{F_c}{G}}{I_{aa}}$$

570

571 Using published methods<sup>20</sup>, the calibration factors were experimentally determined for mTFP1 and  
572 Venus (A206K). With these two proportionality constants, it is possible to calculate both FRET efficiency  
573 (E):

574

575

$$E = \frac{\frac{F_c}{G}}{I_{dd} + \frac{F_c}{G}}$$

576

577 and the relative concentration of donor and acceptor fluorescent proteins  $[D]/[A]$  (or DPA) in a sample:

578

579

$$\frac{[D]}{[A]} = \frac{I_{dd} + \frac{F_c}{G}}{I_{aa}k}$$

580

581 The calibration constants G and k were monitored over the course of this work to control for changes in  
582 lamp and filter performance.

583

584 Segmentation routines were used to quantitate FRET efficiencies within FA's (for images of the basal  
585 focal plane) or AJ's and Cytosol (for images of the apical focal plane). All operations were conducted on  
586 the acceptor channel, which is independent of FRET and proportional to the concentration of VinTS or  
587 VinCS. Segmentation of FAs was done as previously reported using a water-based algorithm<sup>43</sup>. Briefly,  
588 for AJ segmentation, edge detection on the acceptor image was conducted using a dispersive phase  
589 stretch transform<sup>44</sup>. The resultant edge detection was then high-pass filtered and a user-defined  
590 intensity threshold was used to eliminate background signal and isolate the AJs. For basal and apical  
591 images, binary masks containing all FA's or all AJ's, respectively, were applied to FRET efficiency images.  
592 Cytosolic signal was examined in all apical images by inverting the AJ mask and then removing nuclear  
593 regions from the cytosolic mask via local normalization followed by morphological processing. After  
594 segmentation, closed boundaries were manually drawn by the user based on the unmasked acceptor  
595 channel image to include regions with appropriate and uniform expression of the sensor. Information  
596 outside manual boundaries was discarded. For each image, mean acceptor intensity, FRET efficiency,  
597 and donor-per-acceptor ratio were characterized.

598

599 To ensure the quality of FRET data, a multi-scale filtering approach was used. In comparing samples, the  
600 same filtering approach was applied to each population of data points. First, at the pixel level, regions  
601 detected as having DPA outside of the 0.5-2.0 range, were discarded. Then, at the image level, images  
602 with less than 2000 px in the analysis region were discarded. Additionally images were discarded if >33%  
603 of the pixels were removed for out-of-bounds DPA. Overall, the pixel-level filtering process removed less

604 than 5% of pixels on average (across all constructs and all subcellular structures), and the image-level  
605 filtering process removed less than 3% of images.

606

### 607 **Kinase Inhibitor Treatments**

608 Inhibitor treatments were performed on cells in the droplet assay 72 hr post-seeding. To inhibit Src  
609 kinase, cells were treated with 10  $\mu$ M PP2 (Abcam ab120308) for 1 hour. To inhibit Abl kinase, cells were  
610 treated with 50  $\mu$ M Imatinib (Sigma SML1027) for 1 hour. After treatment, cells were washed, fixed, and  
611 imaged as previously described.

612

### 613 **Quantification of Actin Organization at the Edge of Migrating Monolayers**

614 Actin organization was assessed using phalloidin labeling of actin (see Fixation & Immunofluorescent  
615 Staining) in the droplet assay 72 hr post-seeding. Lamellipodia and actin belts (of continuous contour  
616 length greater than 75 $\mu$ m) were identified manually.

617

### 618 **Quantification of Abundance of Proteins at AJs in Migrating Monolayers**

619 The abundance of proteins at the AJ were assessed using immunofluorescent labeling (see Fixation &  
620 Immunofluorescent Staining) in the droplet assay 72 hr post-seeding. As with FRET imaging, all images  
621 were corrected for dark current, uneven illumination, background intensity, and three-dimensional  
622 offsets caused by chromatic aberrations and minute hardware misalignments (registration). Then, binary  
623 masks of the AJs were generated via high-pass filtering of the immunofluorescent channel using custom  
624 MATLAB software and applied to images to obtain average intensities for each image. To account for  
625 day-to-day variability in immunofluorescent staining, the immunofluorescent signals were each  
626 normalized by day.

627

### 628 **Quantitation of Vinculin FA Morphology**

629 To quantify vinculin focal adhesion (FA) morphology, images of immunofluorescent-labeled vinculin or  
630 the acceptor channel of VinCS or VinTS were used. Focal adhesion segmentation was performed as  
631 described above using the signal of immunofluorescent-labeled vinculin or the acceptor channel of  
632 VinCS or VinTS. For each FA, the distance from its center to the nearest point on a manually drawn  
633 leading edge was determined. The orientation of the FA was defined as the angle between the major  
634 axis of the ellipse fit to the FA and the normal direction of the leading edge at the nearest point to the  
635 FA. As such, 0° indicates the FA is parallel to the migration direction, and 90° indicates the FA is  
636 perpendicular to the migration direction. FA's were binned on distance from leading edge, and FA area  
637 and orientation were plotted as functions of distance from leading edge.

638

### 639 **Estimation of VinCS Closed FRET Efficiency and Normalization of VinCS FRET Data**

640 To obtain a reference value for the fully closed FRET Eff of VinCS, VinCS-expressing pMDCK cells were  
641 sparsely seeded on poly-L-Lysine coated surfaces, where they non-specifically adhered, as previously  
642 done<sup>13</sup>. In detail, glass bottom dishes were coated with Poly-L-Lysine (Sigma P4832-50ML) using the  
643 Millipore Sigma Poly-L-Lysine Cell Attachment Protocol. pMDCK cells stably expressing VinCS were  
644 sparsely seeded on the pL coated dishes with standard media and allowed to adhere for 30 minutes,  
645 after which they were immediately fixed or imaged. FRET Eff was analyzed on a cell basis, using a  
646 manual cell mask and minimum acceptor intensity threshold (BSA>1000), identical to the analysis  
647 approach for VinCS in the cytosol of MDCK monolayers. Cells that were highly spread, as determined by  
648 bright field images, possessed cell-substrate adhesions, as determined by VinCS localization, or had too  
649 low VinCS expression (>50% of pixels had BSA values below the BSA threshold) were excluded. The  
650 mean FRET Eff from the VinCS on poly-L-Lysine experiments was used to normalize the FRET Eff values  
651 for VinCS in cell monolayers.

652

### 653 **Confocal Imaging and FRET Analysis**

654 For confocal imaging, samples were imaged with an Andor XD Revolution Spinning Disk Confocal, which  
655 consists of an Olympus IX81 inverted microscope equipped with a Yokogawa CsuX-1 spinning disk  
656 (5000rpm) controlled with Metamorph Software. This microscope is maintained by the Duke Light  
657 Microscope Core Facility. Images were acquired at 100x magnification (UPlanSApo 100X/NA1.4  
658 Objective, Olympus) using an Andor EMCCD Camera (Ixon3 897 512 EMCCD). The FRET images were  
659 acquired using a filter set comprised of a mTFP1 emission filter (483/32), Venus emission filter (542/27)  
660 and dichroic mirror (CYR; 445/515/561). For FRET microscopy, three images were acquired. These  
661 images included the acceptor (515nm 50mW diode excitation, Venus emission), FRET (445nm 40mW  
662 diode excitation, Venus emission), and donor (445nm 40mW diode excitation, mTFP1 emission). Images  
663 were acquired without gain and a 75% laser power. Exposure times for Venus, FRET, and Teal were  
664 1000ms, 1500ms, and 1500ms, respectively. Images were post-processed to correct for dark current and  
665 aligned using a custom MATLAB script. Ratiometric FRET images were determined by dividing the FRET  
666 image by its respective mTFP1 image. Segmentation of cells and adhesions was conducted on the  
667 acceptor channel using a custom MATLAB script and user-defined masking.

668

### 669 **Stimulated Emission Depletion Microscopy (STED) Imaging of Actin**

670 Cells were fixed, permeabilized and blocked as described previously. For STED imaging, cells were  
671 labeled with Alexa Fluor 488 phalloidin (Invitrogen) at a concentration of 1:25. Following  
672 immunofluorescent staining, PBS was removed from the sample, and ProLong™ Diamond Antifade  
673 Mountant (Invitrogen, P36965) was applied per manufacturer's instructions. Mountant set for 24hrs  
674 before imaging. Samples were imaged using a Leica STED Confocal, which consists of an inverted Leica  
675 DMI8 Platform with motorized scanning stage and controlled by LAS X. Images were acquired at 93x (HC  
676 PL APO 93X/1.30 GLYC motCORR, Leica). Alexa Fluor 488 was excited with a tunable white light laser and  
677 simultaneously depleted with a 660nm laser. Sample emission was collected using a high-sensitivity,  
678 gated GaAsP HyD detector. Hyugens deconvolution, linked to Leica's LAS X software, was implemented  
679 to deconvolve image stacks.

680

### 681 **Statistics**

682 Statistical analyses were performed using JMP Pro (SAS, Cary, NC) software. Comparisons of data with  
683 equal variances, as determined with Levene's test, were analyzed with an ANOVA and, if necessary,  
684 Tukey's Honest Significant Difference (HSD) tests. Datasets with unequal variances were analyzed with a  
685 non-parametric Welch's ANOVA and, if necessary, the Steel-Dwass multiple comparisons test. A  $p$  value  
686 of  $p < 0.05$  was considered statistically significant. In figures, a single asterisk (\*), double asterisk (\*\*),  
687 triple asterisk (\*\*\*), and quadruple asterisk (\*\*\*\*) indicate p-values less than 0.05, 0.01, 0.001, and  
688 0.0001 respectively, and ns indicates a p-value greater than or equal to 0.05. Where used, standard box  
689 plots were created using JMP Pro, where the bottom and top of the box indicate the first and third  
690 quartiles, respectively, the middle line indicates the median, the whiskers extend to the outermost data  
691 points below the first quartile and above the third quartile that are within 1.5 times the interquartile  
692 range, and data outside the whiskers are indicated as points.

693

### 694 **Computational Friction Clutch Models of FA and AJ**

695 Details on the computational friction clutch models of the FA and AJ and their implementation are  
696 provided in the Supplementary Note 1. MATLAB code used to simulate the model can be made available  
697 on request to the corresponding author.

698

### 699 **Code availability**

700 Computer code used in this study can be made available on request to the corresponding author.

701

### 702 **Data availability**

703 All data supporting the findings of the study are available from the authors on reasonable request.

704

### 705 **Acknowledgements and Funding**

706 We thank Dr. Adam Kwiatkowski (University of Pittsburgh) for providing MDCK II cells used in this study  
707 and Dr. Akira Nagafuchi (Nara Medical University) for providing the  $\alpha$ -catenin conformation-sensitive  
708 antibody ( $\alpha$ 18). This research was supported by the National Institute of Health (1R01GM121739) and  
709 the National Science Foundation (GRFP DGE 1644868).

710

### 711 **Author Contributions**

712 B.D.H. conceived the project and obtained funding. T.C.S., E.M.G., J.I.C., and D.E.C. created key reagents  
713 and/or cell lines. T.C.S. and E.M.G. designed and conducted experiments. T.C.S. and E.M.G. performed  
714 data analyses. T.C.S. designed, implemented, and analyzed mathematical models. T.C.S. and B.D.H.  
715 wrote and edited the paper.

716

### 717 **Competing Interests**

718 The authors declare no competing interests.

719

### 720 **Additional Information**

721

722 **Extended Data Figures** are included following main figures.

723

724 **Supplementary Information** Supplementary Notes I and II are included in separate documents.

725

726

### 727 **FIGURE LEGENDS**

728 **Fig. 1 Vinculin is loaded and conformationally open at the edge of collectively migrating cells.** (a)

729 Representative image field of VinTS at the edge of migrating MDCK II cell monolayers in the basal plane  
730 with acceptor channel indicating sensor localization followed by zoom-in views of acceptor channel and  
731 FRET efficiency in the FA mask for the indicated region. Asterisk indicates free space adjacent to

732 monolayer edge. (b) Representative image field of VinTS in the apical plane with acceptor channel  
733 followed by zoom-in views of acceptor channel and FRET efficiency in AJ and cytoplasm masks for the  
734 indicated region. (c) Box-whisker plot showing FRET efficiency for VinTS at FAs, AJs, and cytoplasm

735 (n=43, 34, and 34 image fields respectively over at least 3 independent experiments). Differences  
736 between groups were detected using the Steel-Dwass test (\*\*\*\*p < 0.0001). P-values shown are for

737 comparisons to VinTS-I997A in MDCK II cells at the same structure (Extended Data Fig. 4c); p values for

738 all comparisons can be found in Supplemental Note 2 Table S1. (d) Representative image field of VinCS

739 at the edge of migrating MDCK II cell monolayers in the basal plane with acceptor channel indicating

740 sensor localization followed by zoom-in views of acceptor channel and FRET efficiency in the FA mask for  
741 the indicated region. (e) Representative image field of VinCS in the apical plane with acceptor channel

742 followed by zoom-in views of acceptor channel and FRET efficiency in AJ and cytoplasm masks for the

743 indicated region. (f) Box-whisker plot showing FRET efficiency for VinCS at FAs, AJs, and cytoplasm

744 (n=61, 51, and 52 image fields respectively over at least 3 independent experiments). Differences



745 between groups were detected using the Steel-Dwass test (\*\*\*\* $p < 0.0001$ ). P-values shown are for  
746 comparisons to the VinCS reference condition (Extended Data Fig. 2c); p values for all comparisons can  
747 be found in Supplemental Note 2 Table S2.

748 **Fig. 2 Vinculin S1033 mediates a regulatory switch that affects vinculin load and conformation at the**  
749 **edge of collectively migrating cells.** (a-c) Representative image fields of VinTS, VinTS-S1033A, or VinTS-  
750 S1033D at the edge of migrating MDCK Parental cell monolayers in the apical plane with acceptor  
751 channel indicating sensor localization followed by zoom-in views of acceptor channel and FRET efficiency  
752 in AJ and cytoplasm masks for the indicated region. Asterisk indicates free space adjacent to monolayer  
753 edge. (d) Box-whisker plot showing FRET efficiency for VinTS, VinTS-S1033A, and VinTS-S1033D in AJs  
754 ( $n=61, 55,$  and  $48$  image fields respectively over at least 3 independent experiments) and cytoplasm  
755 ( $n=60, 55,$  and  $48$  image fields respectively over at least 3 independent experiments). (e-g)  
756 Representative image fields of VinCS, VinCS-S1033A, or VinCS-S1033D at the edge of MDCK Parental cell  
757 monolayers in the apical plane with acceptor channel indicating sensor localization followed by zoom-in  
758 views of acceptor channel and FRET efficiency in AJ and cytoplasm masks for the indicated region. (h)  
759 Box-whisker plot showing normalized FRET efficiency for VinCS, VinCS-S1033A, and VinCS-S1033D in AJs  
760 ( $n=58, 26,$  and  $37$  image fields respectively over at least 3 independent experiments) and cytoplasm  
761 ( $n=58, 26,$  and  $37$  image fields respectively over at least 3 independent experiments). Differences  
762 between groups were detected using the Steel-Dwass test (\*\*\*\* $p < 0.0001$ , ns not significant); p values  
763 for all comparisons can be found in Supplemental Note 2, Tables S4-5.

764 **Fig. 3 Vinculin Regulatory Switch Affects Speed and Correlation Length of Collective Cell Migration.** (a-  
765 d) Representative image fields of MDCK II Vcl KO, VinV, VinV-S1033A, or VinV-S1033D cell monolayers in  
766 the barrier migration assay showing (i) phase contrast image, (ii) velocity field, (iii) velocity magnitude,  
767 and (iv) lateral velocity deviation. (e-f) Plots showing mean and all data points for velocity magnitude  
768 and correlation length for lateral velocity deviations ( $n=16$  monolayers for each cell line over 6  
769 independent experiments). Differences between groups were detected using Tukey's HSD test. Levels  
770 not connected by the same letter are significantly different. (g) Log-log plot of correlation length versus  
771 RMS lateral velocity deviations for individual image fields and timepoints with mean for each cell line,  
772 combined mean, and fit of the combined data to  $\log_{10}(Y)=m*\log_{10}(X)+b$  with 95% confidence interval  
773 shaded. See Extended Data Fig 10 for data plotted separately by cell line.

774 **Fig. 4 Effect of Vinculin Regulatory Switch in Models of Molecular Friction at the FA and AJ.** (a-b)  
775 Schematics of FA and AJ friction clutch models. Linkage schematics depict different values for the  
776 fraction of linkages with loadable vinculin ( $\rho_{Vcl}$ ). (c-d) For FA friction clutch model, plots of mean linkage  
777 engagement lifetime and mean effective friction coefficient ( $F/v$ ) versus speed ( $v$ ) for 5 values of the  
778 fraction of loadable vinculin ( $\rho_{Vcl}$ ). (e) Plot of mean effective friction coefficient (left y-axis) and mean  
779 ensemble vinculin molecular tension (right y-axis) versus fraction of loadable vinculin for an  
780 intermediate speed (10  $\mu\text{m/hr}$ ). (f-h) Analogous plots for the AJ friction clutch model. See  
781 Supplementary Note 1 for more information about the friction clutch models.

782 **Extended Data Fig. 1 Controls for droplet island assay and expression of VinTS and VinCS in MDCK**  
783 **cells.** (a) Schematic depiction of droplet island assay. (b-c) Representative phase contrast images of  
784 migrating MDCK II or MDCK Parental islands at 2 and 3 days after droplet seeding. (d) Bar plot (mean +/-  
785 SEM) of normalized area change of droplet island assay between days 2 and 3 with or without treatment  
786 with Actinomycin D for MDCK II cells ( $n=3$  or  $4$  islands, respectively, over at least 3 independent

787 experiments). (e) Same for MDCK Parental cells (n=3 or 4 islands, respectively, over at least 3  
788 independent experiments). (f) Western blot with GFP primary antibody showing that VinTS and VinCS  
789 are produced as stable proteins with the expected molecular weight in both MDCK II and MDCK Parental  
790 cells. (g) Bar plot (mean +/- SEM) of normalized area change of droplet island assay between days 2 and  
791 3 for MDCK II cells expressing no sensor ("None"), VinCS, or VinTS cells (n=12, 4, or 7 islands,  
792 respectively, over at least 3 independent experiments). (h) Same for MDCK Parental cells (n=11, 5, or 4  
793 islands, respectively, over at least 3 independent experiments). (i) Representative images of vinculin  
794 immunolabeling at the edge of migrating MDCK II or MDCK Parental monolayers in the basal (FAs) or  
795 apical (AJs) plane. (j-m) Plots of FA size or FA orientation versus distance from edge for MDCK II or MDCK  
796 Parental cells expressing no sensor ("None"), VinCS, or VinTS. Differences between pairs in (d-e) were  
797 tested for using t-test and differences between groups in (g-h) were tested for using ANOVA (ns: not  
798 significant).

799 **Extended Data Fig. 2 Reference Conditions for VinTS (TSMOD) and VinCS (pL).** (a) Representative  
800 acceptor and masked FRET efficiency images of TSMOD in the cytoplasm of cells at the edge of migrating  
801 MDCK II or MDCK Parental monolayers. (b) Box-whisker plot showing FRET efficiency for TSMOD in MDCK  
802 II cells in live or fixed condition or MDCK Parental cells in live or fixed condition (n=117, 102, 119, and  
803 120 cells, respectively, over 4 independent experiments). Differences between groups were tested for  
804 using a non-parametric Welch's ANOVA (ns: not significant). (c) Representative bright field, acceptor,  
805 and masked FRET efficiency images of VinCS in the cytoplasm of a MDCK Parental cell adhered to poly-L-  
806 lysine surface in the live condition. (d) Box plot shows FRET efficiency for VinCS in the cytoplasm of  
807 single MDCK Parental cells adhered to poly-L-lysine surfaces in the live condition, with mean indicated  
808 by the dashed line (n=244 cells over 3 independent experiments).

809 **Extended Data Fig. 3 VinTS and VinCS at the edge of collectively migrating MDCK Parental cells.** (a)  
810 Representative image field of VinTS at the edge of migrating MDCK Parental cell monolayers in the basal  
811 plane with acceptor channel indicating sensor localization followed by zoom-in views of acceptor  
812 channel and FRET efficiency in the FA mask for the indicated region. (b) Representative image field of  
813 VinTS in the apical plane with acceptor channel followed by zoom-in views of acceptor channel and FRET  
814 efficiency in AJ and cytoplasm masks for the indicated region. (c) Box-whisker plot showing FRET  
815 efficiency for VinTS at FAs, AJs, and cytoplasm (n=67, 48, and 48 image fields respectively over at least 3  
816 independent experiments). Differences between groups were detected using the Steel-Dwass test  
817 (\*\*\*\*p < 0.0001). P-values shown are for comparisons to VinTS-I997A in MDCK Parental cells at the  
818 same structure (Extended Data Fig. 4f); p values for all comparisons can be found in Supplemental Note  
819 2 Table S3. (d) Representative image field of VinCS at the edge of migrating MDCK Parental cell  
820 monolayers in the basal plane with acceptor channel indicating sensor localization followed by zoom-in  
821 views of acceptor channel and FRET efficiency in the FA mask for the indicated region. (e)  
822 Representative image field of VinCS in the apical plane with acceptor channel followed by zoom-in views  
823 of acceptor channel and FRET efficiency in AJ and cytoplasm masks for the indicated region. (f) Box-  
824 whisker plot showing FRET efficiency for VinCS at FAs, AJs, and cytoplasm (n=103, 51, and 53 image  
825 fields respectively over at least 3 independent experiments). Differences between groups were detected  
826 using the Steel-Dwass test (\*\*\*\*p < 0.0001). P-values shown are for comparisons to the VinCS reference  
827 condition (Extended Data Fig. 2c); p values for all comparisons can be found in Supplemental Note 2  
828 Table S2.



829 **Extended Data Fig. 4 VinTS-I997A at the edge of collectively migrating MDCK II and MDCK Parental**  
830 **cells.** (a) Representative image field of VinTS-I997A at the edge of migrating MDCK II cell monolayers in  
831 the basal plane with acceptor channel indicating sensor localization followed by zoom-in views of  
832 acceptor channel and FRET efficiency in the FA mask for the indicated region. (b) Representative image  
833 field of VinTS-I997A in the apical plane with acceptor channel followed by zoom-in views of acceptor  
834 channel and FRET efficiency in AJ and cytoplasm masks for the indicated region. (c) Box-whisker plot  
835 showing FRET efficiency for VinTS-I997A at FAs, AJs, and cytoplasm (n=52, 31, and 31 image fields  
836 respectively over at least 3 independent experiments). (d-f) Analogous representative images and plot  
837 for VinTS-I997A in MDCK Parental cells (n=36, 24, and 25 image fields for FAs, AJs, and cytoplasm,  
838 respectively, over at least 3 independent experiments).

839 **Extended Data Fig. 5 Super-resolution imaging of actin, confocal imaging of VinTS, controls for the**  
840 **fixation of VinTS, and normalization for the fixation of VinCS.** (a-b) Stimulated emission depletion  
841 (STED) super-resolution imaging of phalloidin-labeled actin in collectively migrating MDCK II and MDCK  
842 Parental cells. White arrows indicate regions exhibiting a diffuse, cytoplasmic actin network. (c-d)  
843 Representative image fields for confocal imaging of VinTS or VinTS-I997A at the edge of migrating MDCK  
844 Parental cell monolayers in the apical plane with acceptor channel indicating sensor localization  
845 followed by FRET ratio in AJ and Cytoplasm masks. (e) Box plot showing FRET ratio in AJs and Cytoplasm  
846 for confocal imaging of VinTS and VinTS-I997A (n = 207 and 160 junctions for VinTS and VinTS-I997A AJs,  
847 respectively, and 63 and 44 cells for VinTS and VinTS-I997A Cytoplasm, respectively, over 3 independent  
848 experiments). (f) Box plot showing FRET efficiency at the FAs, AJs, and cytoplasm for VinTS (n=152, 146,  
849 and 146 image fields respectively over at least 3 independent experiments) and VinTS-I997A (n=61, 76,  
850 and 76 image fields respectively over at least 3 independent experiments) at the edge of migrating  
851 MDCK Parental cell monolayers. Differences between groups were detected using the Steel-Dwass test  
852 (ns: not significant). P-values shown are for comparisons to the respective construct at the respective  
853 structure in MDCK Parental cells in the live condition (Extended Data Fig. 3 and 4); p values for all  
854 comparisons can be found in Supplemental Note 2 Table S3. (g) Box plot showing FRET efficiency for  
855 VinCS in the cytoplasm of single MDCK Parental cells adhered to poly-L-lysine surfaces in the fixed  
856 condition, with mean indicated by the dashed line (n=164 cells over 3 independent experiments). (h)  
857 Box plot shows normalized FRET efficiency for VinTS at the edge of MDCK Parental cell monolayers at  
858 the FAs, AJs, and cytoplasm in the live condition (n=40, 23, and 23 respectively over 2 independent  
859 experiments) or fixed condition (n=67, 58, and 58 respectively over 6 independent experiments,  
860 repeated from Fig 2 to show comparison).

861 **Extended Data Fig. 6 Effect of Src and Abl inhibition and Y822F point mutation on vinculin loading at**  
862 **the edge of collectively migrating cells.** (a) Representative image field of VinTS in PP2-treated MDCK  
863 Parental cells in the basal plane with acceptor channel and FRET efficiency in the FA mask. (b)  
864 Representative image field of VinTS in PP2-treated MDCK Parental cells in the apical plane with acceptor  
865 channel and FRET efficiency in AJ and cytoplasm masks. (c-d) Analogous representative image fields for  
866 VinTS in Imatinib-treated MDCK Parental cells. (e) Box-whisker plot showing FRET efficiency of VinTS at  
867 FAs, AJs, and cytoplasm of untreated (n=25, 23, and 23 image fields respectively over 3 independent  
868 experiments), PP2-treated (n=25, 21, and 21 image fields respectively over 3 independent experiments),  
869 and Imatinib-treated (n=23, 26, and 26 image fields respectively over 3 independent experiments) cells.  
870 Differences between groups were detected using the Tukey HSD test. Levels not connected by the same  
871 letter are significantly different. (f) Representative image field of VinTS-Y822F at the edge of migrating

872 MDCK Parental cell monolayers in the basal plane with acceptor channel indicating sensor localization  
873 followed by zoom-in views of acceptor channel and FRET efficiency in the FA mask for the indicated  
874 region. (g) Representative image field of VinTS-Y822F in the apical plane with acceptor channel followed  
875 by zoom-in views of acceptor channel and FRET efficiency in AJ and cytoplasm masks for the indicated  
876 region. (h) Box-whisker plot showing FRET efficiency of VinTS-Y822F at FAs, AJs, and cytoplasm (n=44,  
877 42, and 58 image fields respectively over at least 3 independent experiments). Differences between  
878 groups were detected using the Steel-Dwass test (ns: not significant). P-values shown are for  
879 comparisons to VinTS in MDCK Parental cells at the same structure (Extended Data Fig. 5); p values for  
880 all comparisons can be found in Supplemental Note 2 Table S3.

881 **Extended Data Fig. 7 Effect of vinculin S1033 mutants on vinculin load and conformation in FAs at the**  
882 **leading edge of collectively migrating cells.** (a-c) Representative image fields of VinTS, VinTS-S1033A, or  
883 VinTS-S1033D at the edge of MDCK Parental cell monolayers in the basal plane with acceptor channel  
884 indicating sensor localization followed by zoom-in views of acceptor channel and FRET efficiency in FA  
885 masks for the indicated region. (d) Box-whisker plot showing FRET efficiency for VinTS, VinTS-S1033A,  
886 and VinTS-S1033D in FAs (n=85, 55, and 49 image fields respectively over at least 3 independent  
887 experiments). (e-g) Representative image fields of VinCS, VinCS-S1033A, or VinCS-S1033D at the edge of  
888 MDCK Parental cell monolayers in the basal plane with acceptor channel indicating sensor localization  
889 followed by zoom-in views of acceptor channel and FRET efficiency in FA masks for the indicated region.  
890 (h) Box-whisker plot showing FRET efficiency for VinTS, VinTS-S1033A, and VinTS-S1033D in FAs (n=67,  
891 35, and 30 image fields respectively over at least 3 independent experiments). Differences between  
892 groups were detected using the Steel-Dwass test (\*\*\*\*:  $p < 0.0001$ , ns: not significant); p values for all  
893 comparisons can be found in Supplemental Note 2, Tables S4-5.

894 **Extended Data Fig. 8 Rescue of Vcl KO MDCK II cells with Vinculin-mVenus and S1033 mutants.** (a)  
895 Western blot with vinculin antibody confirming CRISPR/Cas9-mediated knockout of vinculin in MDCK II  
896 cells. (b) Western blot with GFP primary antibody showing production of stable proteins with the  
897 expected molecular weight for rescue of MDCK II Vcl KO cells with Vinculin-mVenus (VinV-WT or VinV),  
898 Vinculin-mVenus-S1033A (VinV-S1033A), or Vinculin-mVenus-S1033D (VinV-S1033D). (c-e)  
899 Representative image fields of VinV, VinV-S1033A, or VinV-S1033D at the edge of migrating MDCK II  
900 monolayers in the basal (FAs) and apical (AJs) plane, with zoom-in views. (f-g) Plots of FA size and FA  
901 orientation versus distance from edge for VinV, VinV-S1033A, or VinV-S1033D MDCK II monolayers.

902 **Extended Data Fig. 9 Expression of VinV, VinV-S1033A, or VinV-S1033D does not affect actin structures**  
903 **at the leading edge and has small or no effects on the abundance of E-cadherin or abundance of total**  
904 **or extended  $\alpha$ -catenin at AJs.** (a-d) Representative image fields of phalloidin labeling at the edge of  
905 migrating Vcl KO, VinV, VinV-S1033A, or VinV-S1033D MDCK II cell monolayers. Stars indicate manually  
906 identified lamellipodia. (e-f) Bar plots showing number of lamellipodia per image field or number of  
907 actin belts per image field for Vcl KO, VinV, VinV-S1033A, or VinV-S1033D MDCK II cells (n=3 droplet  
908 island assays per cell line over 3 independent experiments). (g-j) Representative image fields of E-  
909 cadherin immunolabeling at the edge of migrating Vcl KO, VinV, VinV-S1033A, or VinV-S1033D MDCK II  
910 cell monolayers. (k) Bar plot showing normalized mean E-cadherin stain intensity in AJ masks for Vcl KO,  
911 VinV, VinV-S1033A, and VinV-S1033D MDCK II cells (n=48, 44, 41, and 41 images over 3 independent  
912 experiments). (i-o) Representative image fields of  $\alpha$ -catenin immunolabeling at the edge of migrating Vcl  
913 KO, VinV, VinV-S1033A, or VinV-S1033D MDCK II cell monolayers. (p) Bar plot showing normalized mean  
914  $\alpha$ -catenin stain intensity in AJ masks for Vcl KO, VinV, VinV-S1033A, and VinV-S1033D MDCK II cells

915 (n=37, 39, 36, and 37 images over 3 independent experiments). (q-t) Representative image fields of  $\alpha$ -  
916 catenin extended conformation-sensitive antibody ( $\alpha$ 18) immunolabeling at the edge of migrating Vcl  
917 KO, VinV, VinV-S1033A, or VinV-S1033D MDCK II cell monolayers. (u) Bar plot showing normalized mean  
918  $\alpha$ -catenin extended conformation-sensitive antibody ( $\alpha$ 18) stain intensity in AJ masks for Vcl KO, VinV,  
919 VinV-S1033A, and VinV-S1033D MDCK II cells (n=36, 37, 35, and 36 images over 3 independent  
920 experiments). Bar plots indicate mean  $\pm$  SEM. Differences between groups in (e-f) were tested for  
921 using ANOVA (ns: not significant). Differences between groups in (k), (p), and (u) were detected using  
922 the Steel-Dwass test. Levels not connected by the same letter are significantly different.

923 **Extended Data Fig. 10 Quantification of migration in barrier assay.** (a-b) Schematic of barrier migration  
924 assay. (c) Example velocity field. (d-e) Plots of time-averaged normalized spatial correlation coefficient  
925 versus radial distance for MDCK II Vcl KO, VinV, VinV-S1033A, or VinV-S1033D cells (n=16 monolayers for  
926 each cell line over 6 independent experiments) with dashed line indicating the threshold value for  
927 computing the correlation length. (f) Plots of correlation length vs binned RMS lateral velocity deviations  
928 for individual image fields and timepoints for MDCK II Vcl KO, VinV, VinV-S1033A, or VinV-S1033D cells  
929 combined (>1,500 timepoints for each cell line). Center of circle indicates mean, error bars indicate SEM,  
930 and size of circle indicates number of data points in bin. This figure contains additional representations  
931 of the same data shown in Fig 3.

## 932 REFERENCES

- 933 1 Friedl, P. & Gilmour, D. Collective cell migration in morphogenesis, regeneration and cancer. *Nat*  
934 *Rev Mol Cell Biol* **10**, 445-457, doi:10.1038/nrm2720 (2009).
- 935 2 Friedl, P., Locker, J., Sahai, E. & Segall, J. E. Classifying collective cancer cell invasion. *Nat Cell Biol*  
936 **14**, 777-783, doi:10.1038/ncb2548 (2012).
- 937 3 Friedl, P. & Mayor, R. Tuning Collective Cell Migration by Cell-Cell Junction Regulation. *Cold*  
938 *Spring Harb Perspect Biol* **9**, doi:10.1101/cshperspect.a029199 (2017).
- 939 4 Scarpa, E. & Mayor, R. Collective cell migration in development. *J Cell Biol* **212**, 143-155,  
940 doi:10.1083/jcb.201508047 (2016).
- 941 5 Campbell, K. & Casanova, J. A common framework for EMT and collective cell migration.  
942 *Development* **143**, 4291-4300, doi:10.1242/dev.139071 (2016).
- 943 6 Ladoux, B. & Mege, R. M. Mechanobiology of collective cell behaviours. *Nat Rev Mol Cell Biol* **18**,  
944 743-757, doi:10.1038/nrm.2017.98 (2017).
- 945 7 Alert, R. & Trepast, X. Physical Models of Collective Cell Migration. *Annual Review of Condensed*  
946 *Matter Physics* **11**, 77-101, doi:10.1146/annurev-conmatphys-031218-013516 (2020).
- 947 8 Bazellieres, E. *et al.* Control of cell-cell forces and collective cell dynamics by the intercellular  
948 adhesome. *Nat Cell Biol* **17**, 409-420, doi:10.1038/ncb3135 (2015).
- 949 9 Simpson, K. J. *et al.* Identification of genes that regulate epithelial cell migration using an siRNA  
950 screening approach. *Nat Cell Biol* **10**, 1027-1038, doi:10.1038/ncb1762 (2008).
- 951 10 Rubashkin, M. G. *et al.* Force engages vinculin and promotes tumor progression by enhancing  
952 PI3K activation of phosphatidylinositol (3,4,5)-triphosphate. *Cancer Res* **74**, 4597-4611,  
953 doi:10.1158/0008-5472.CAN-13-3698 (2014).
- 954 11 Xu, W., Baribault, H. & Adamson, E. D. Vinculin knockout results in heart and brain defects  
955 during embryonic development. *Development* **125**, 327-337, doi:10.1242/dev.125.2.327 (1998).
- 956 12 Dumbauld, D. W. *et al.* How vinculin regulates force transmission. *Proc Natl Acad Sci U S A* **110**,  
957 9788-9793, doi:10.1073/pnas.1216209110 (2013).

- 958 13 Grashoff, C. *et al.* Measuring mechanical tension across vinculin reveals regulation of focal  
959 adhesion dynamics. *Nature* **466**, 263-266, doi:10.1038/nature09198 (2010).
- 960 14 le Duc, Q. *et al.* Vinculin potentiates E-cadherin mechanosensing and is recruited to actin-  
961 anchored sites within adherens junctions in a myosin II-dependent manner. *J Cell Biol* **189**, 1107-  
962 1115, doi:10.1083/jcb.201001149 (2010).
- 963 15 Leerberg, J. M. *et al.* Tension-sensitive actin assembly supports contractility at the epithelial  
964 zonula adherens. *Curr Biol* **24**, 1689-1699, doi:10.1016/j.cub.2014.06.028 (2014).
- 965 16 Huang, D. L., Bax, N. A., Buckley, C. D., Weis, W. I. & Dunn, A. R. Vinculin forms a directionally  
966 asymmetric catch bond with F-actin. *Science* **357**, 703-706, doi:10.1126/science.aan2556 (2017).
- 967 17 Bays, J. L. & DeMali, K. A. Vinculin in cell-cell and cell-matrix adhesions. *Cell Mol Life Sci* **74**,  
968 2999-3009, doi:10.1007/s00018-017-2511-3 (2017).
- 969 18 Dukes, J. D., Whitley, P. & Chalmers, A. D. The MDCK variety pack: choosing the right strain. *BMC*  
970 *Cell Biol* **12**, 43, doi:10.1186/1471-2121-12-43 (2011).
- 971 19 Chen, H., Cohen, D. M., Choudhury, D. M., Kioka, N. & Craig, S. W. Spatial distribution and  
972 functional significance of activated vinculin in living cells. *J Cell Biol* **169**, 459-470,  
973 doi:10.1083/jcb.200410100 (2005).
- 974 20 Gates, E. M., LaCroix, A. S., Rothenberg, K. E. & Hoffman, B. D. Improving Quality,  
975 Reproducibility, and Usability of FRET-Based Tension Sensors. *Cytometry A* **95**, 201-213,  
976 doi:10.1002/cyto.a.23688 (2019).
- 977 21 Bays, J. L. *et al.* Vinculin phosphorylation differentially regulates mechanotransduction at cell-  
978 cell and cell-matrix adhesions. *J Cell Biol* **205**, 251-263, doi:10.1083/jcb.201309092 (2014).
- 979 22 Sumida, G. M., Tomita, T. M., Shih, W. & Yamada, S. Myosin II activity dependent and  
980 independent vinculin recruitment to the sites of E-cadherin-mediated cell-cell adhesion. *BMC*  
981 *Cell Biol* **12**, 48, doi:10.1186/1471-2121-12-48 (2011).
- 982 23 Case, L. B. *et al.* Molecular mechanism of vinculin activation and nanoscale spatial organization  
983 in focal adhesions. *Nat Cell Biol* **17**, 880-892, doi:10.1038/ncb3180 (2015).
- 984 24 Rothenberg, K. E., Scott, D. W., Christoforou, N. & Hoffman, B. D. Vinculin Force-Sensitive  
985 Dynamics at Focal Adhesions Enable Effective Directed Cell Migration. *Biophys J* **114**, 1680-1694,  
986 doi:10.1016/j.bpj.2018.02.019 (2018).
- 987 25 Thompson, P. M. *et al.* Identification of an actin binding surface on vinculin that mediates  
988 mechanical cell and focal adhesion properties. *Structure* **22**, 697-706,  
989 doi:10.1016/j.str.2014.03.002 (2014).
- 990 26 Zhang, Z. *et al.* The phosphorylation of vinculin on tyrosine residues 100 and 1065, mediated by  
991 SRC kinases, affects cell spreading. *Mol Biol Cell* **15**, 4234-4247, doi:10.1091/mbc.e04-03-0264  
992 (2004).
- 993 27 Auernheimer, V. & Goldmann, W. H. Serine phosphorylation on position 1033 of vinculin  
994 impacts cellular mechanics. *Biochem Biophys Res Commun* **450**, 1095-1098,  
995 doi:10.1016/j.bbrc.2014.06.122 (2014).
- 996 28 Poujade, M. *et al.* Collective migration of an epithelial monolayer in response to a model wound.  
997 *Proc Natl Acad Sci U S A* **104**, 15988-15993, doi:10.1073/pnas.0705062104 (2007).
- 998 29 Vig, D. K., Hamby, A. E. & Wolgemuth, C. W. On the Quantification of Cellular Velocity Fields.  
999 *Biophys J* **110**, 1469-1475, doi:10.1016/j.bpj.2016.02.032 (2016).
- 1000 30 Petitjean, L. *et al.* Velocity fields in a collectively migrating epithelium. *Biophys J* **98**, 1790-1800,  
1001 doi:10.1016/j.bpj.2010.01.030 (2010).
- 1002 31 Garcia, S. *et al.* Physics of active jamming during collective cellular motion in a monolayer. *Proc*  
1003 *Natl Acad Sci U S A* **112**, 15314-15319, doi:10.1073/pnas.1510973112 (2015).
- 1004 32 Sens, P. Rigidity sensing by stochastic sliding friction. *Europhysics Letters* **104**, 38003,  
1005 doi:10.1209/0295-5075/104/38003 (2013).

- 1006 33 Alert, R. & Trepap, X. Physical Models of Collective Cell Migration. **11**, 77-101,  
1007 doi:10.1146/annurev-conmatphys-031218-013516 (2020).
- 1008 34 Elosegui-Artola, A. *et al.* Mechanical regulation of a molecular clutch defines force transmission  
1009 and transduction in response to matrix rigidity. *Nat Cell Biol* **18**, 540-548, doi:10.1038/ncb3336  
1010 (2016).
- 1011 35 Case, L. B. & Waterman, C. M. Integration of actin dynamics and cell adhesion by a three-  
1012 dimensional, mechanosensitive molecular clutch. *Nat Cell Biol* **17**, 955-963,  
1013 doi:10.1038/ncb3191 (2015).
- 1014 36 Hoffman, B. D., Grashoff, C. & Schwartz, M. A. Dynamic molecular processes mediate cellular  
1015 mechanotransduction. *Nature* **475**, 316-323, doi:10.1038/nature10316 (2011).
- 1016 37 Hoffman, B. D. & Yap, A. S. Towards a Dynamic Understanding of Cadherin-Based  
1017 Mechanobiology. *Trends Cell Biol* **25**, 803-814, doi:10.1016/j.tcb.2015.09.008 (2015).
- 1018 38 Leckband, D. E. & Rooij, J. d. Cadherin Adhesion and Mechanotransduction. *Annual Review of*  
1019 *Cell and Developmental Biology* **30**, 291-315, doi:10.1146/annurev-cellbio-100913-013212  
1020 (2014).
- 1021 39 Ozawa, M. Nonmuscle myosin IIA is involved in recruitment of apical junction components  
1022 through activation of alpha-catenin. *Biol Open* **7**, doi:10.1242/bio.031369 (2018).
- 1023 40 Trepap, X. *et al.* Physical forces during collective cell migration. *Nat Phys* **5**, 426-430,  
1024 doi:10.1038/Nphys1269 (2009).
- 1025 41 LaCroix, A. S., Rothenberg, K. E., Berginski, M. E., Urs, A. N. & Hoffman, B. D. Construction,  
1026 imaging, and analysis of FRET-based tension sensors in living cells. *Methods Cell Biol* **125**, 161-  
1027 186, doi:10.1016/bs.mcb.2014.10.033 (2015).
- 1028 42 Chen, H., Puhl, H. L., Koushik, S. V., Vogel, S. S. & Ikeda, S. R. Measurement of FRET efficiency  
1029 and ratio of donor to acceptor concentration in living cells. *Biophysical Journal* **91**, L39-L41,  
1030 doi:10.1529/biophysj.106.088773 (2006).
- 1031 43 Rothenberg, K. E., Neibart, S. S., LaCroix, A. S. & Hoffman, B. D. Controlling Cell Geometry Affects  
1032 the Spatial Distribution of Load Across Vinculin. *Cell Mol Bioeng* **8**, 364-382, doi:10.1007/s12195-  
1033 015-0404-9 (2015).
- 1034 44 Asghari, M. H. & Jalali, B. Edge detection in digital images using dispersive phase stretch  
1035 transform. *Int J Biomed Imaging* **2015**, 687819, doi:10.1155/2015/687819 (2015).
- 1036



## Figure 1

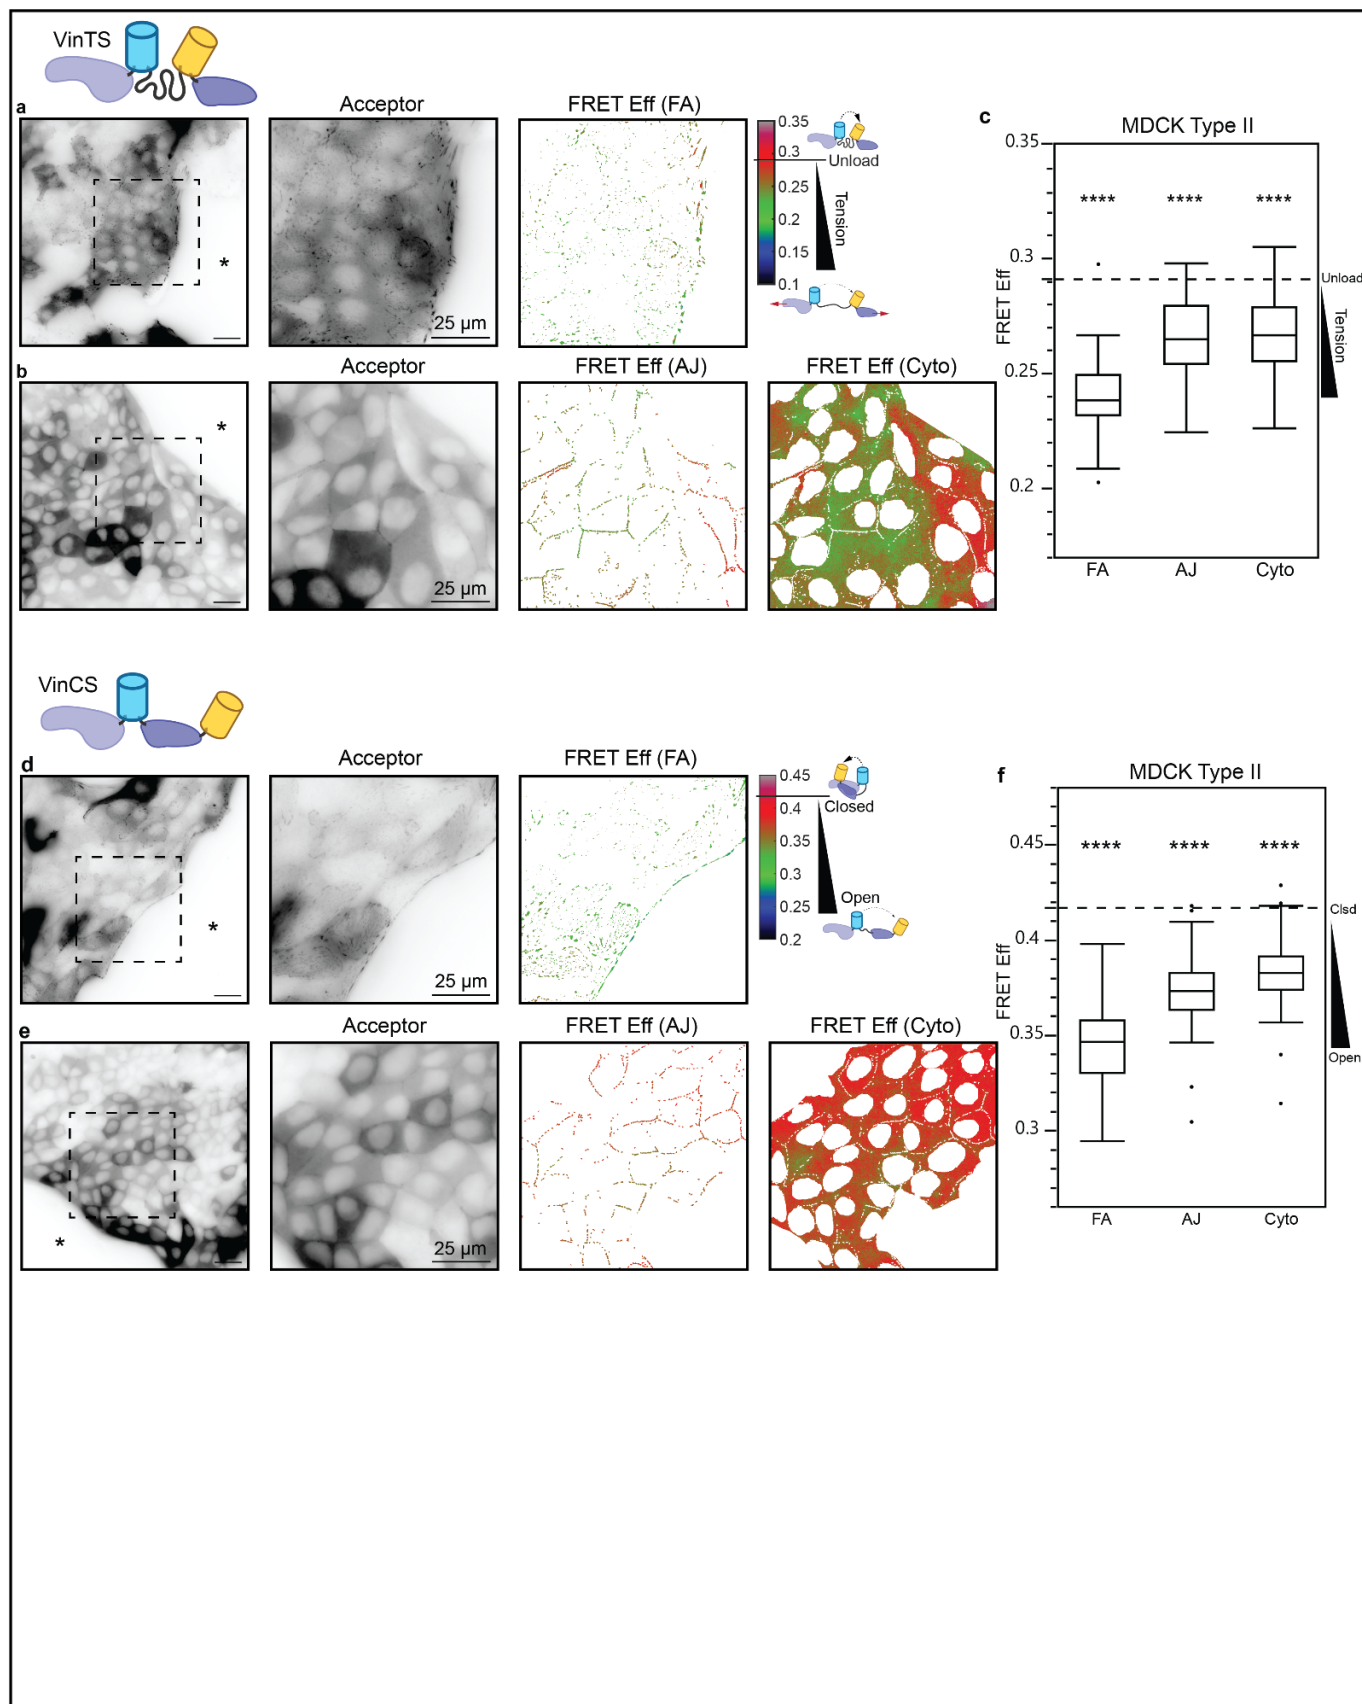

## Figure 2

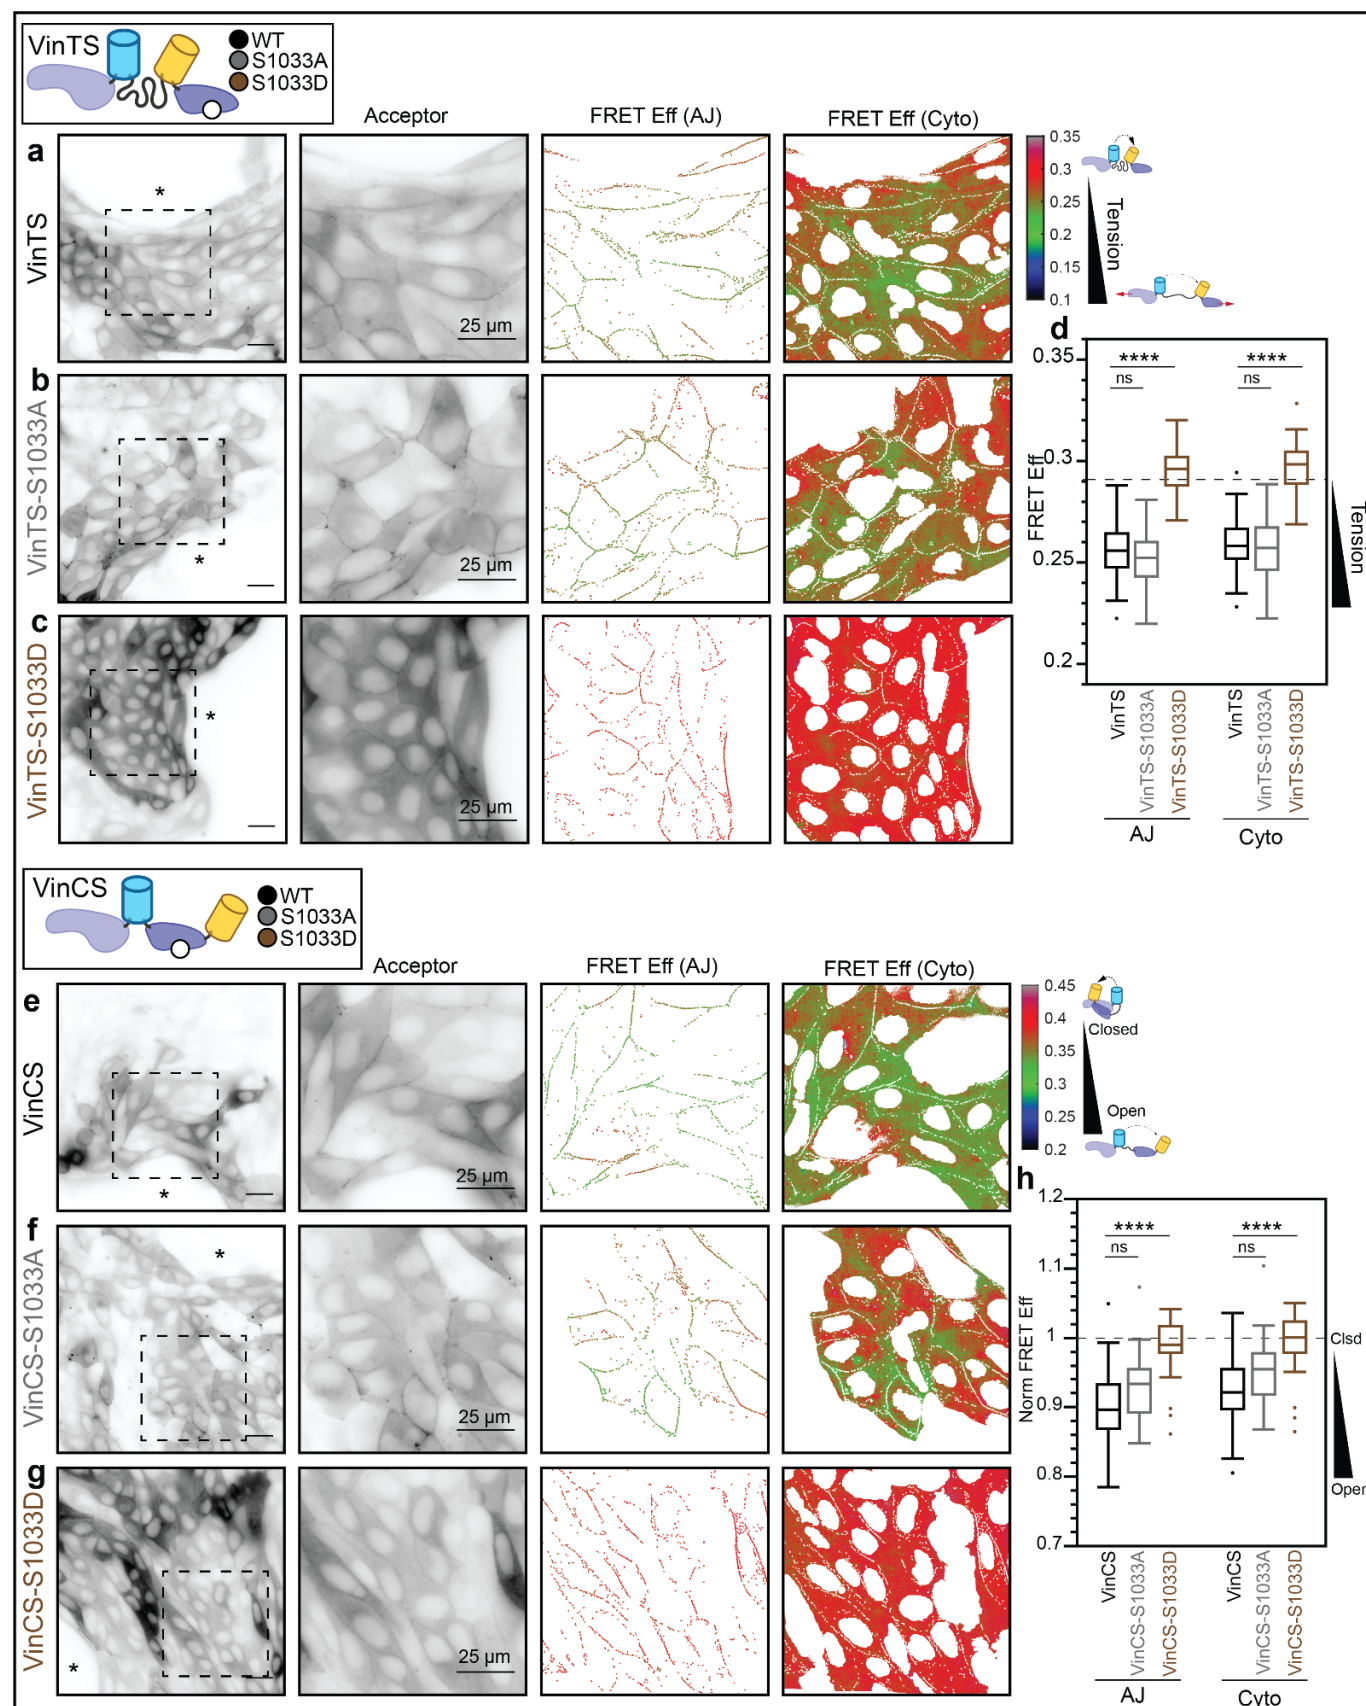

## Figure 3

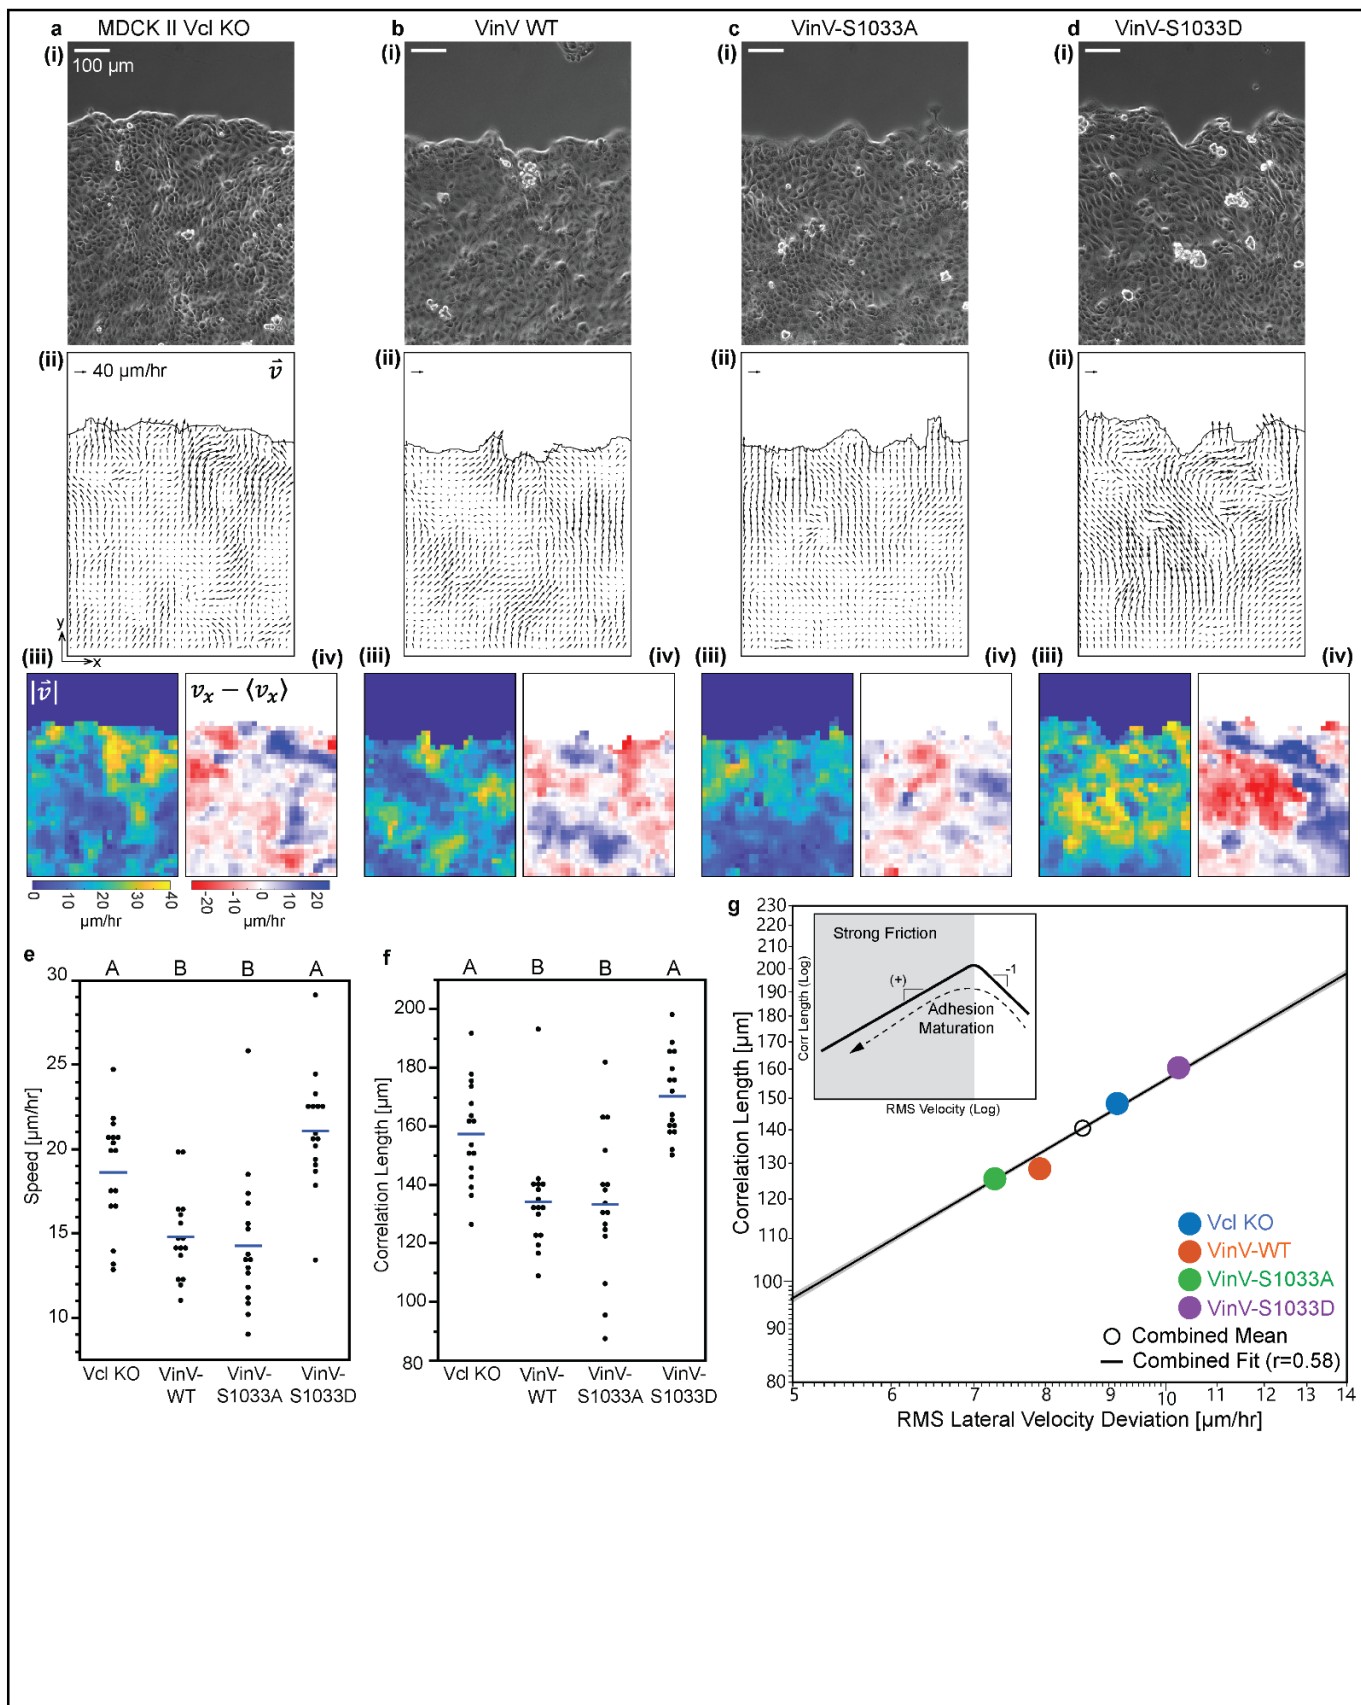



**Figure 4**

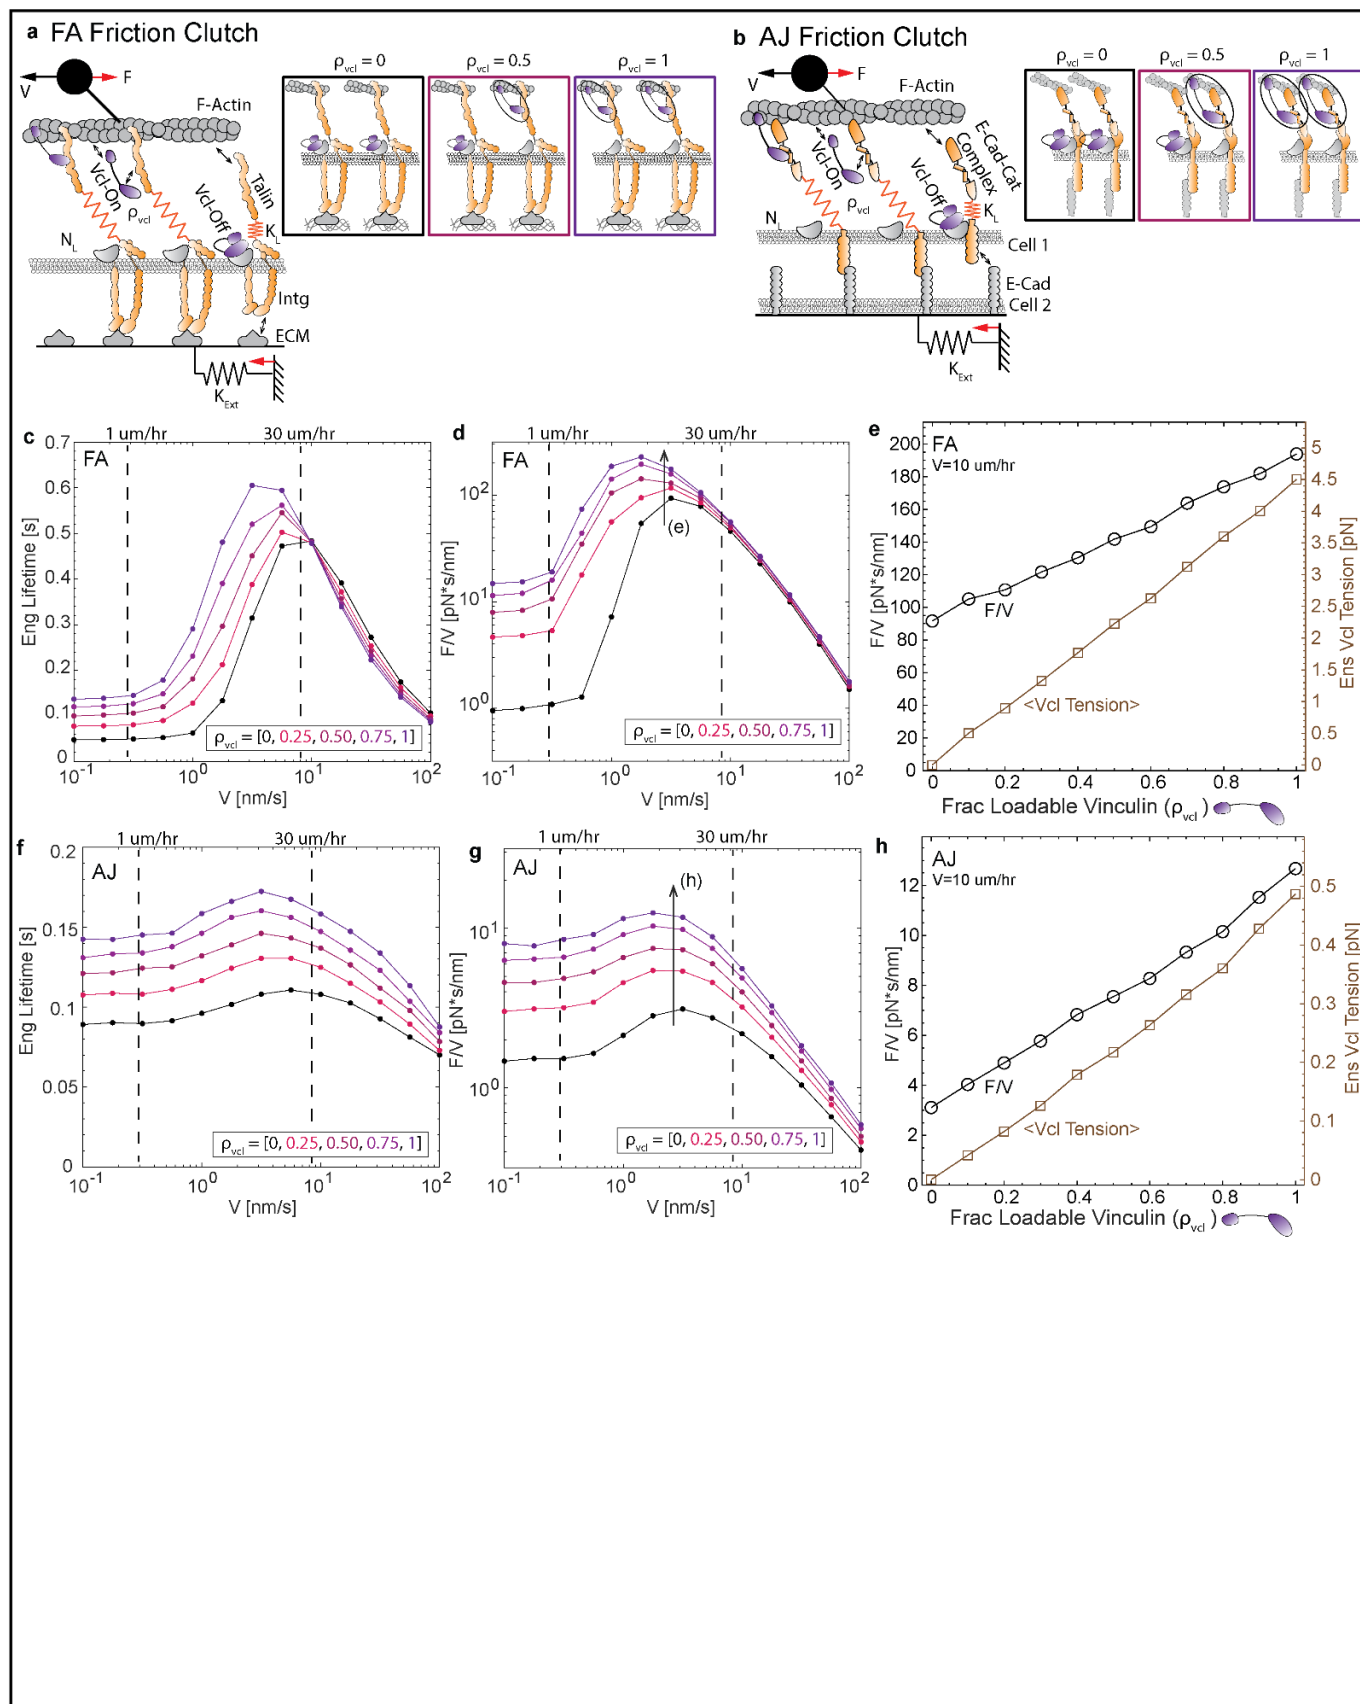

## Extended Data Figure 1

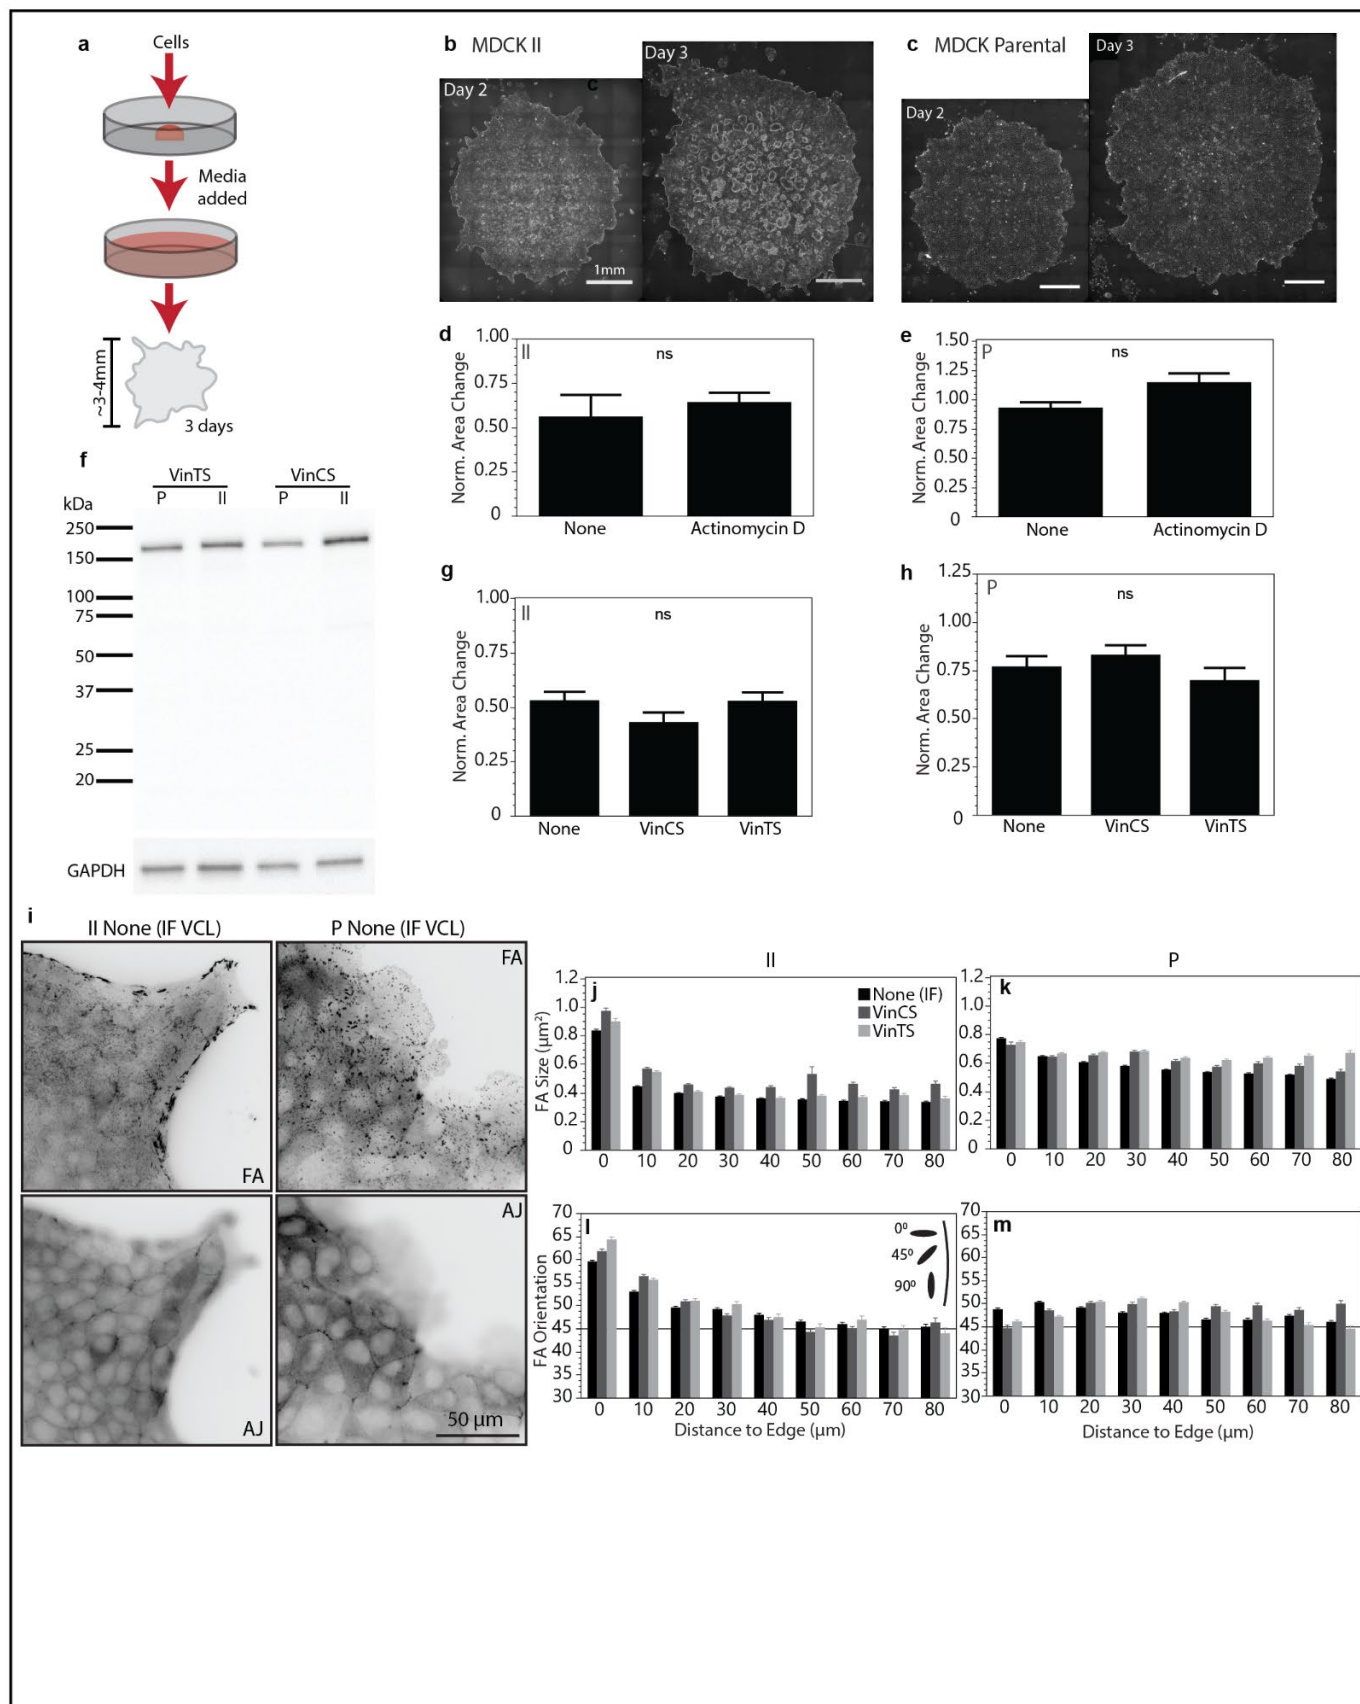

## Extended Data Figure 2

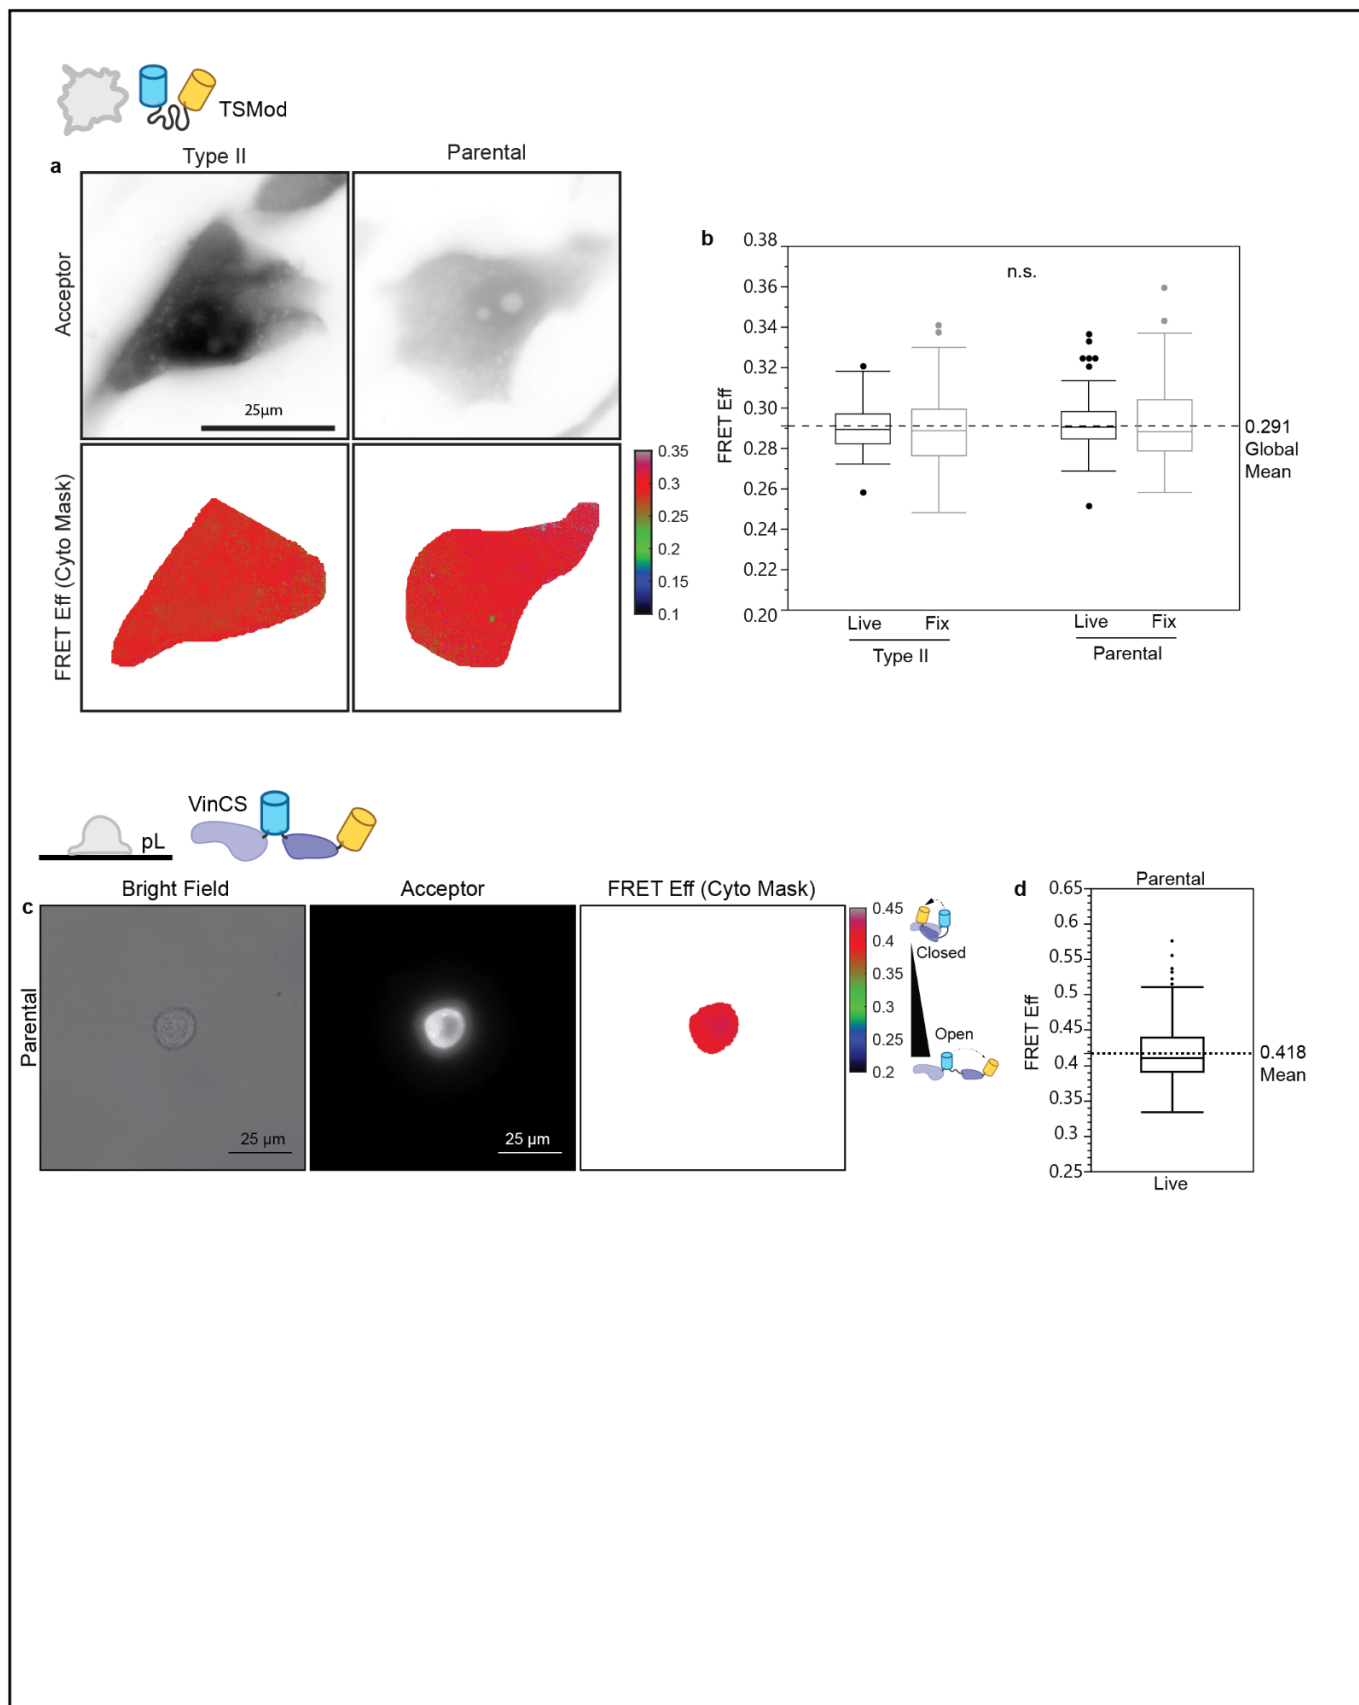

## Extended Data Figure 3

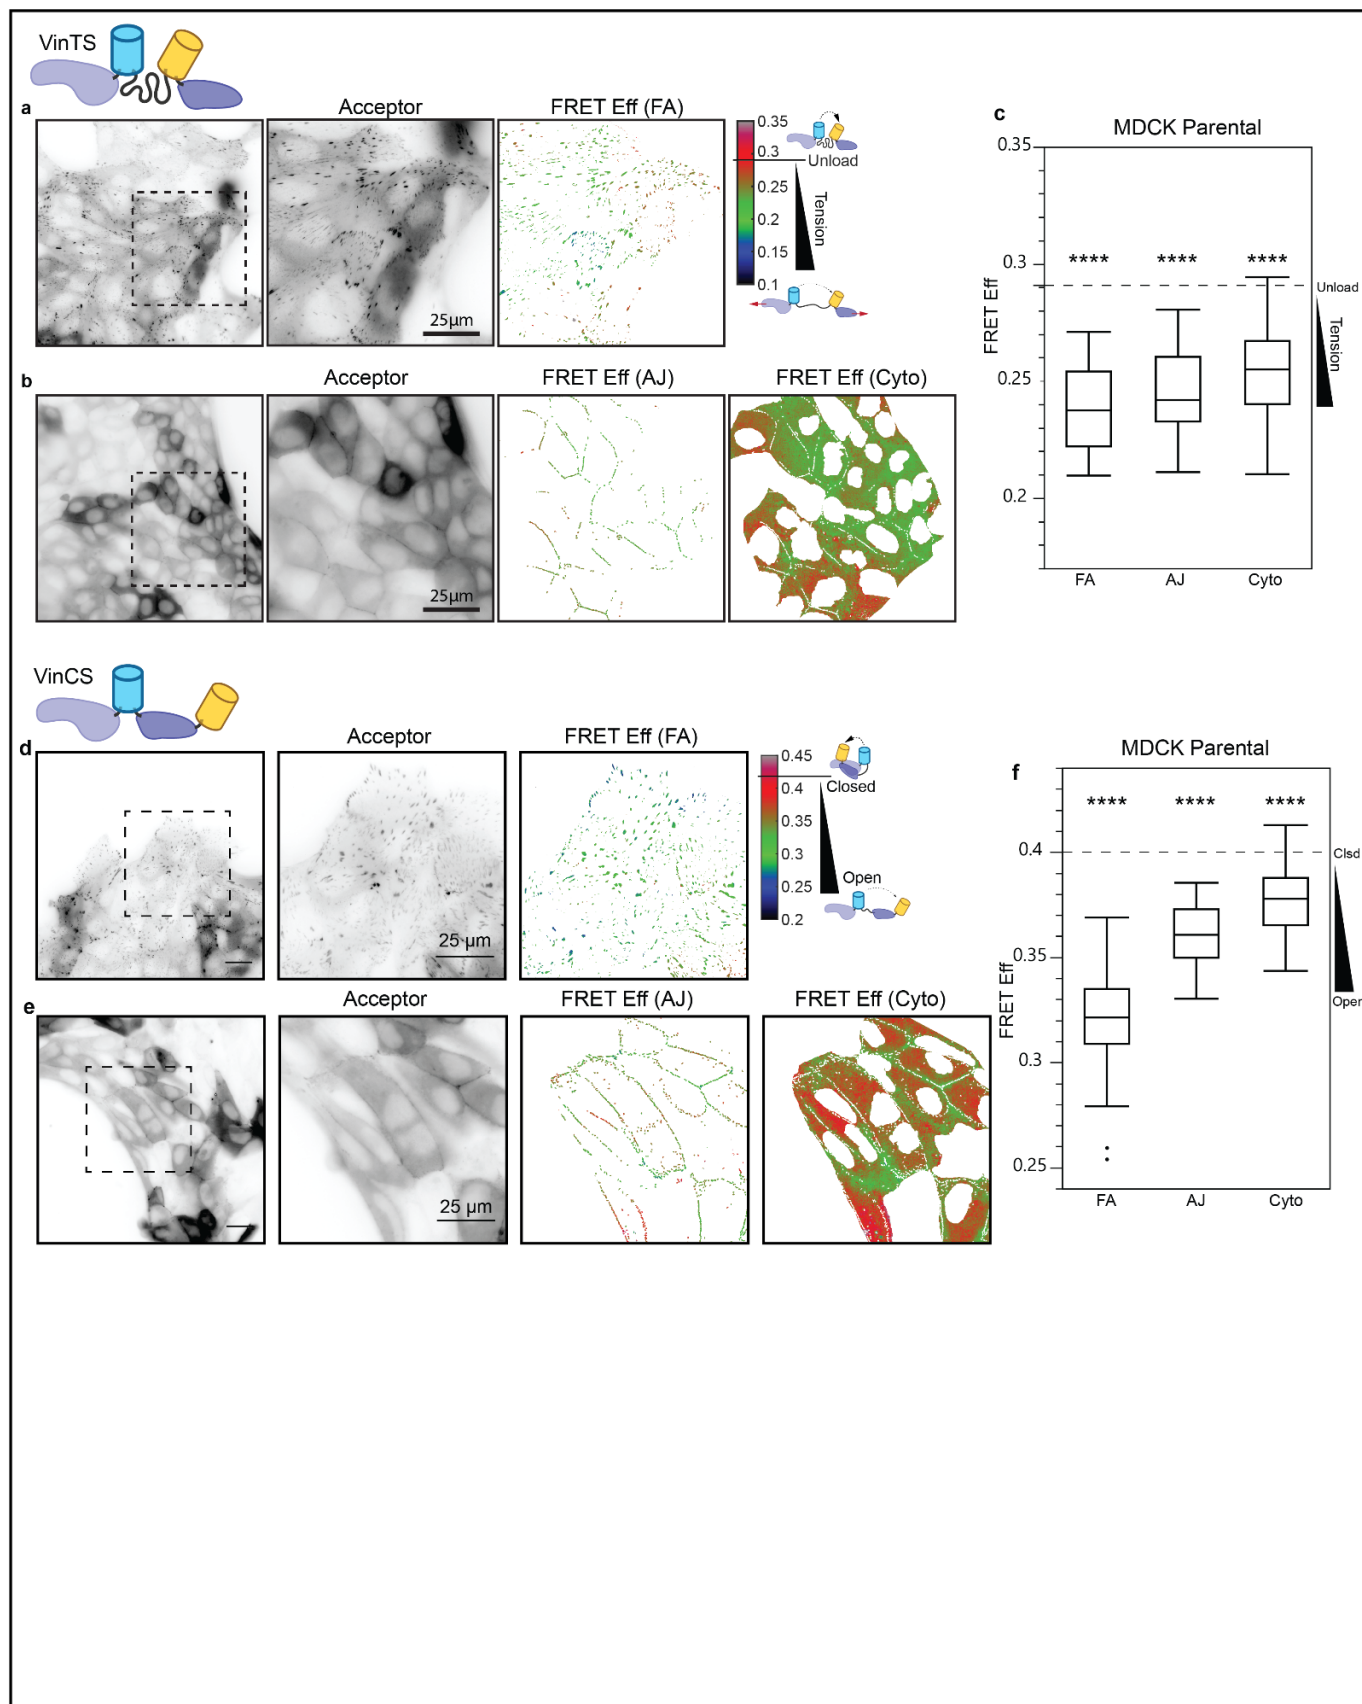

## Extended Data Figure 4

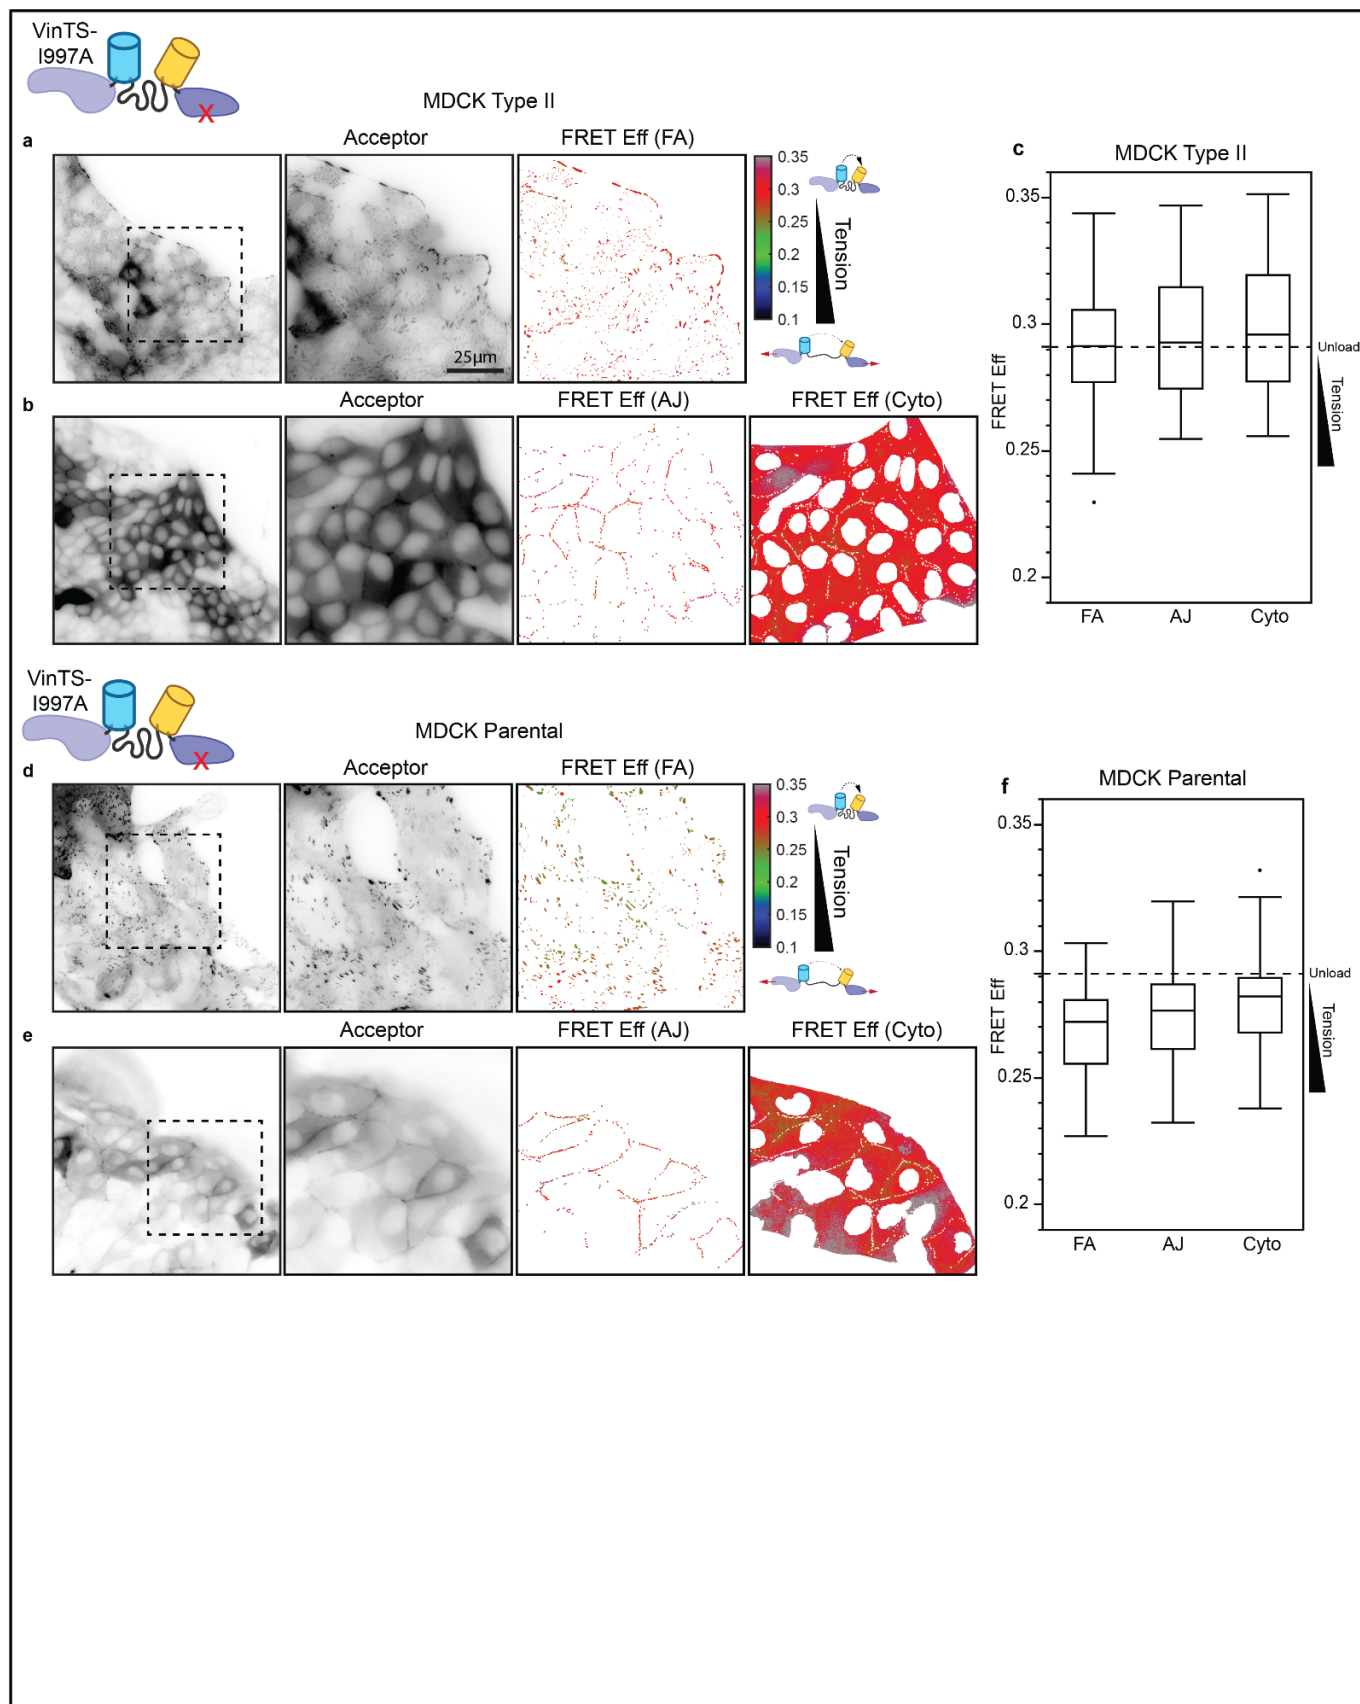



## Extended Data Figure 5

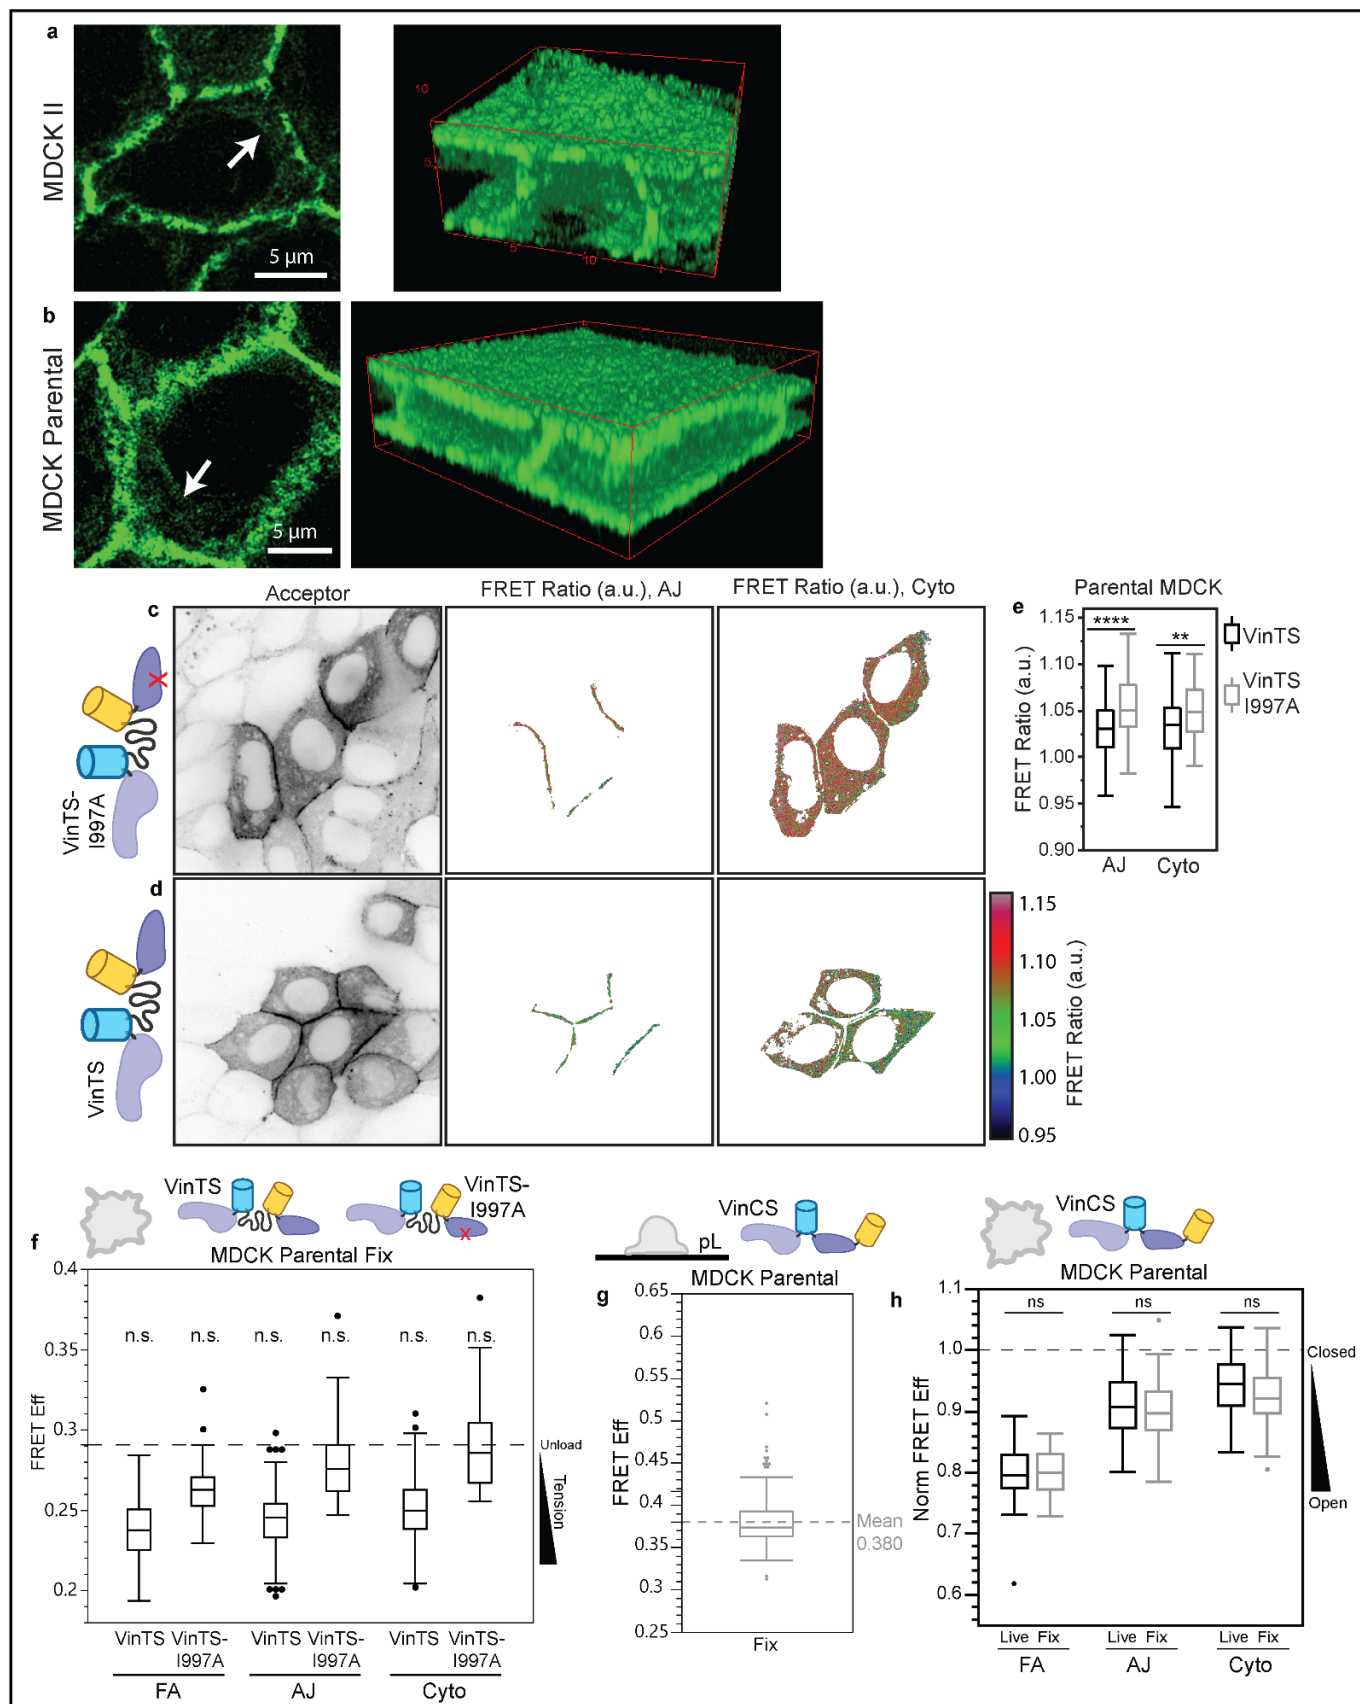

## Extended Data Figure 6

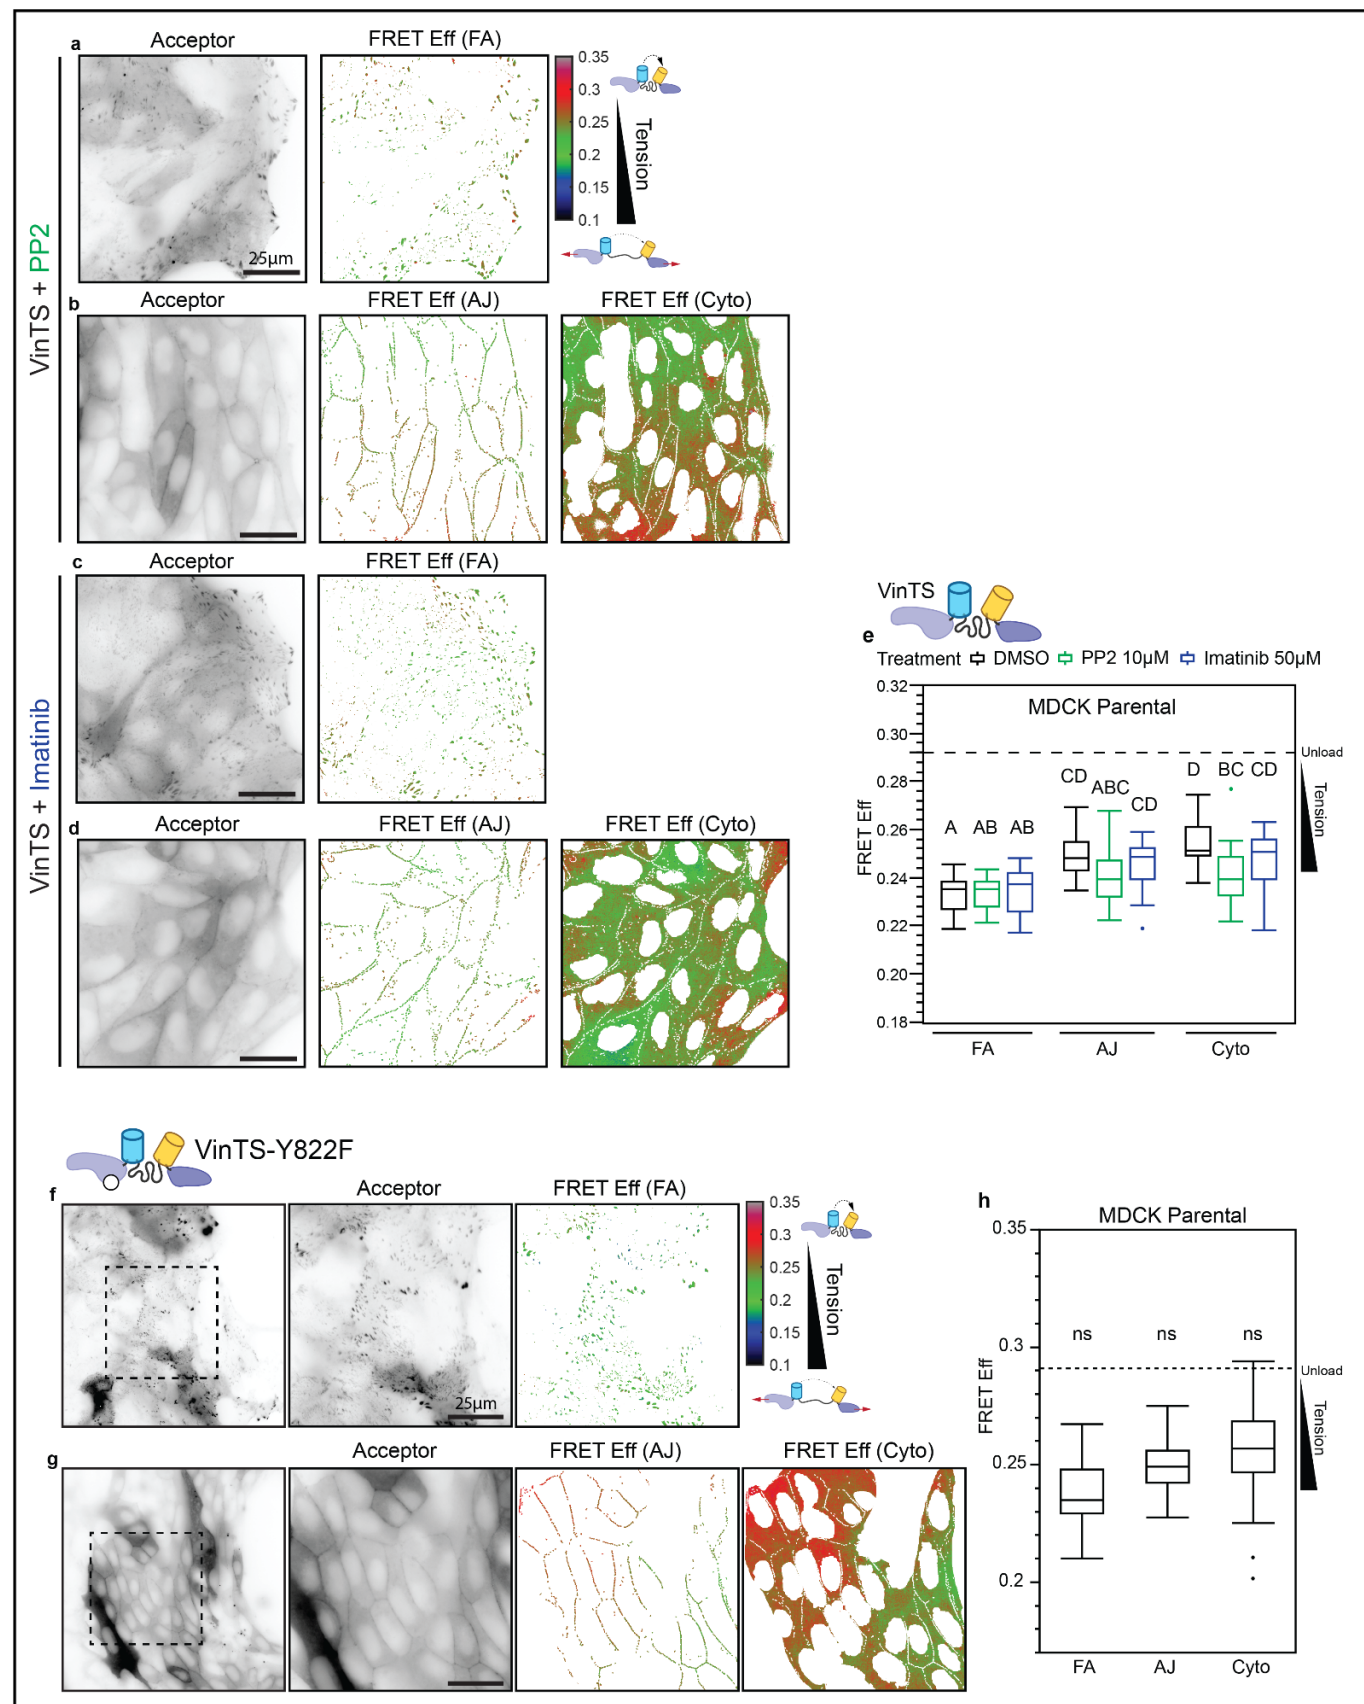

## Extended Data Figure 7

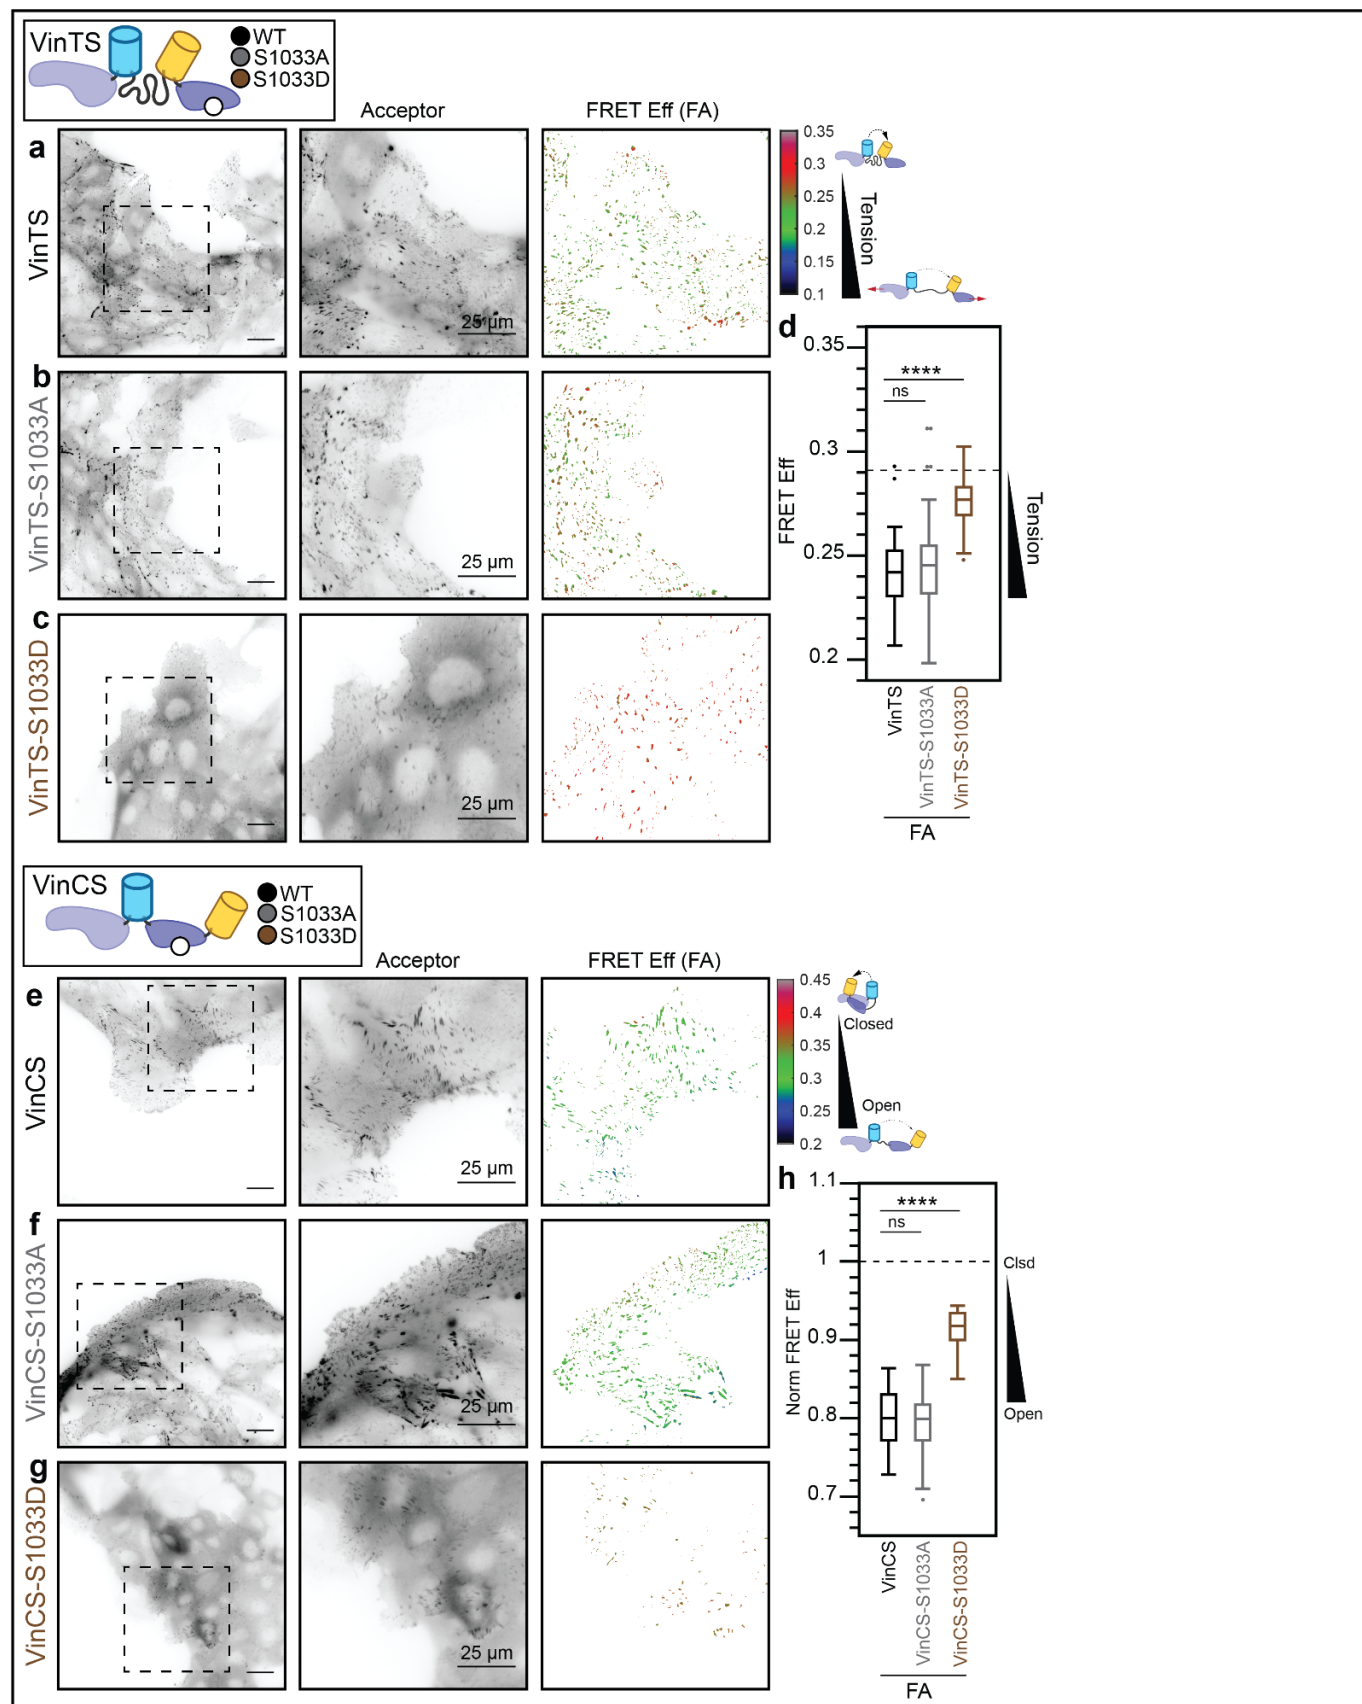



## Extended Data Figure 8

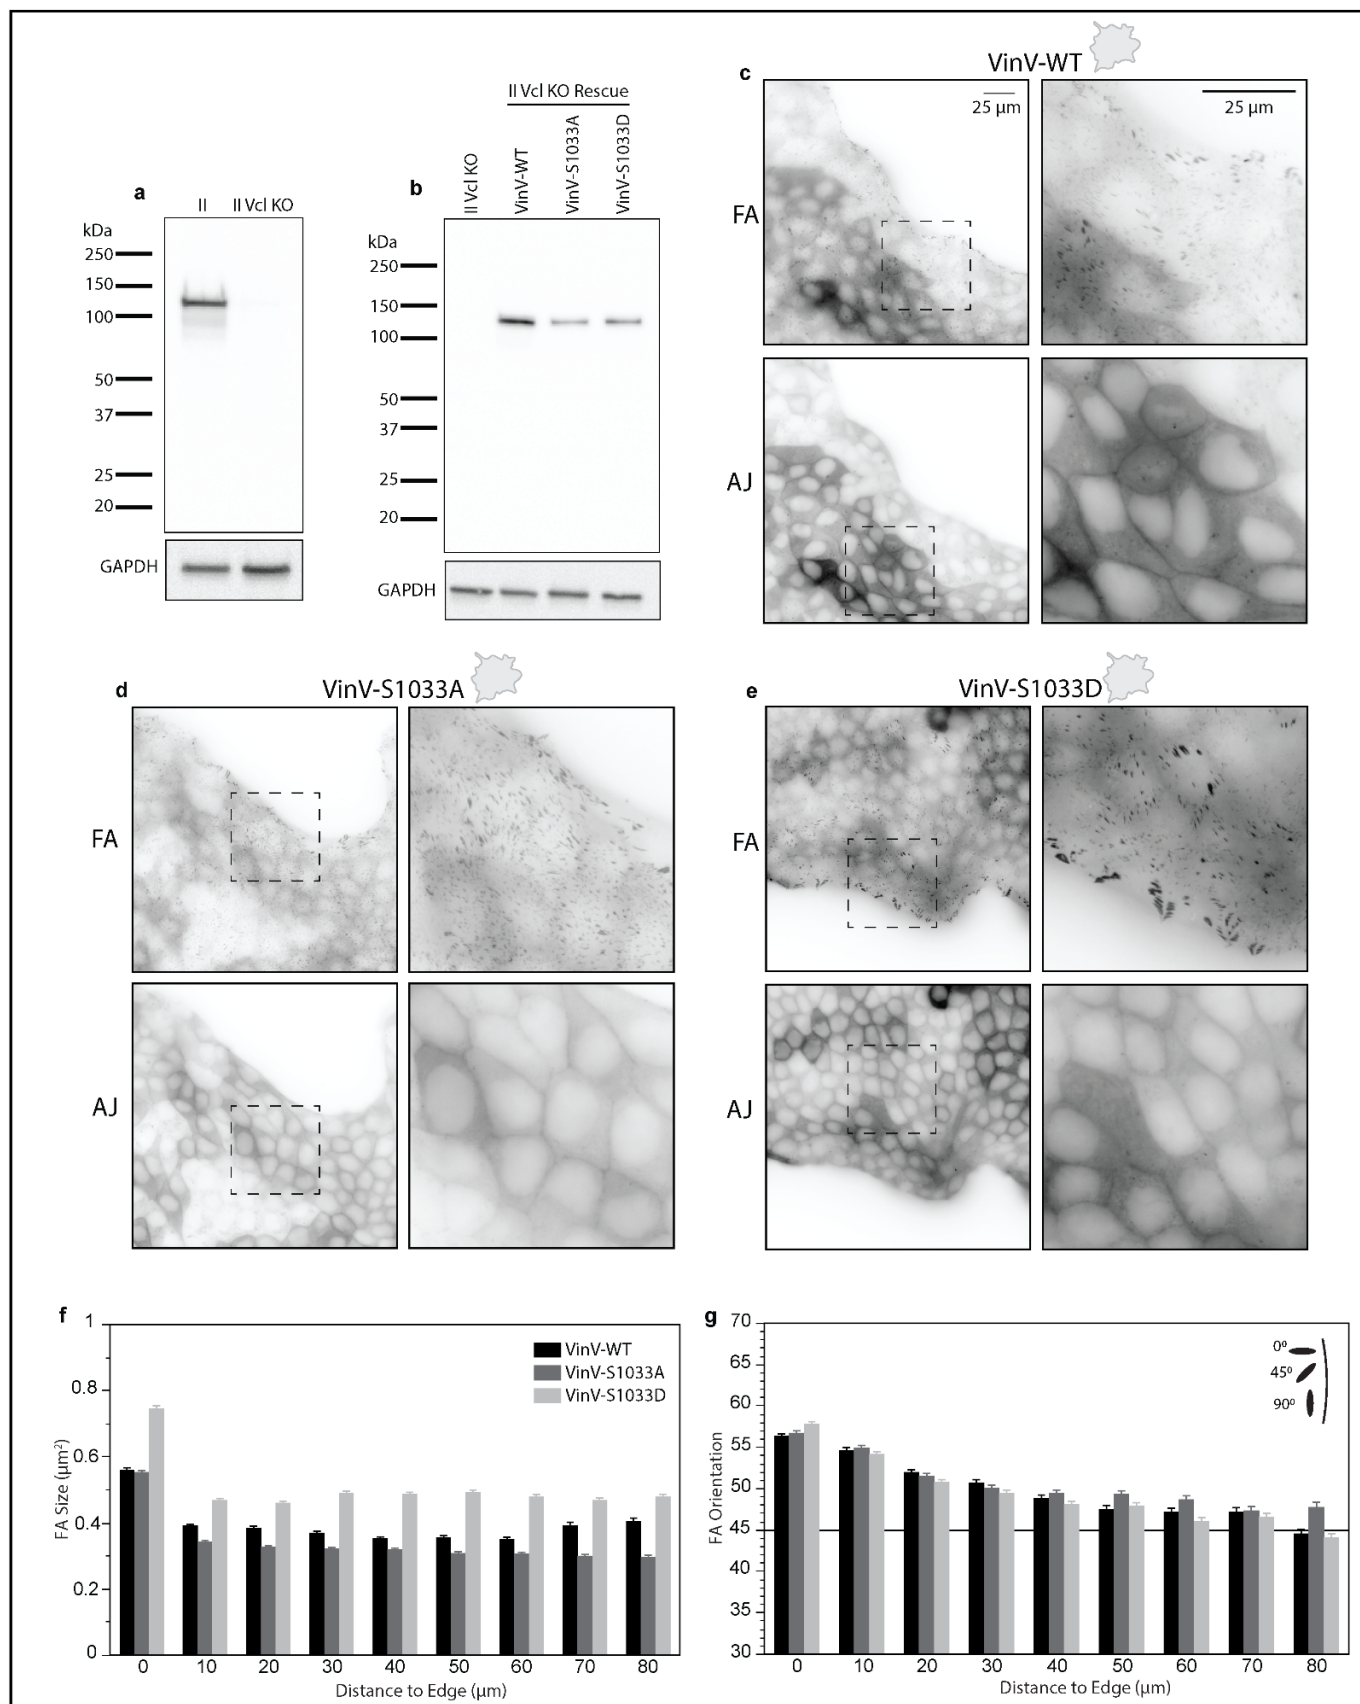



## Extended Data Figure 10

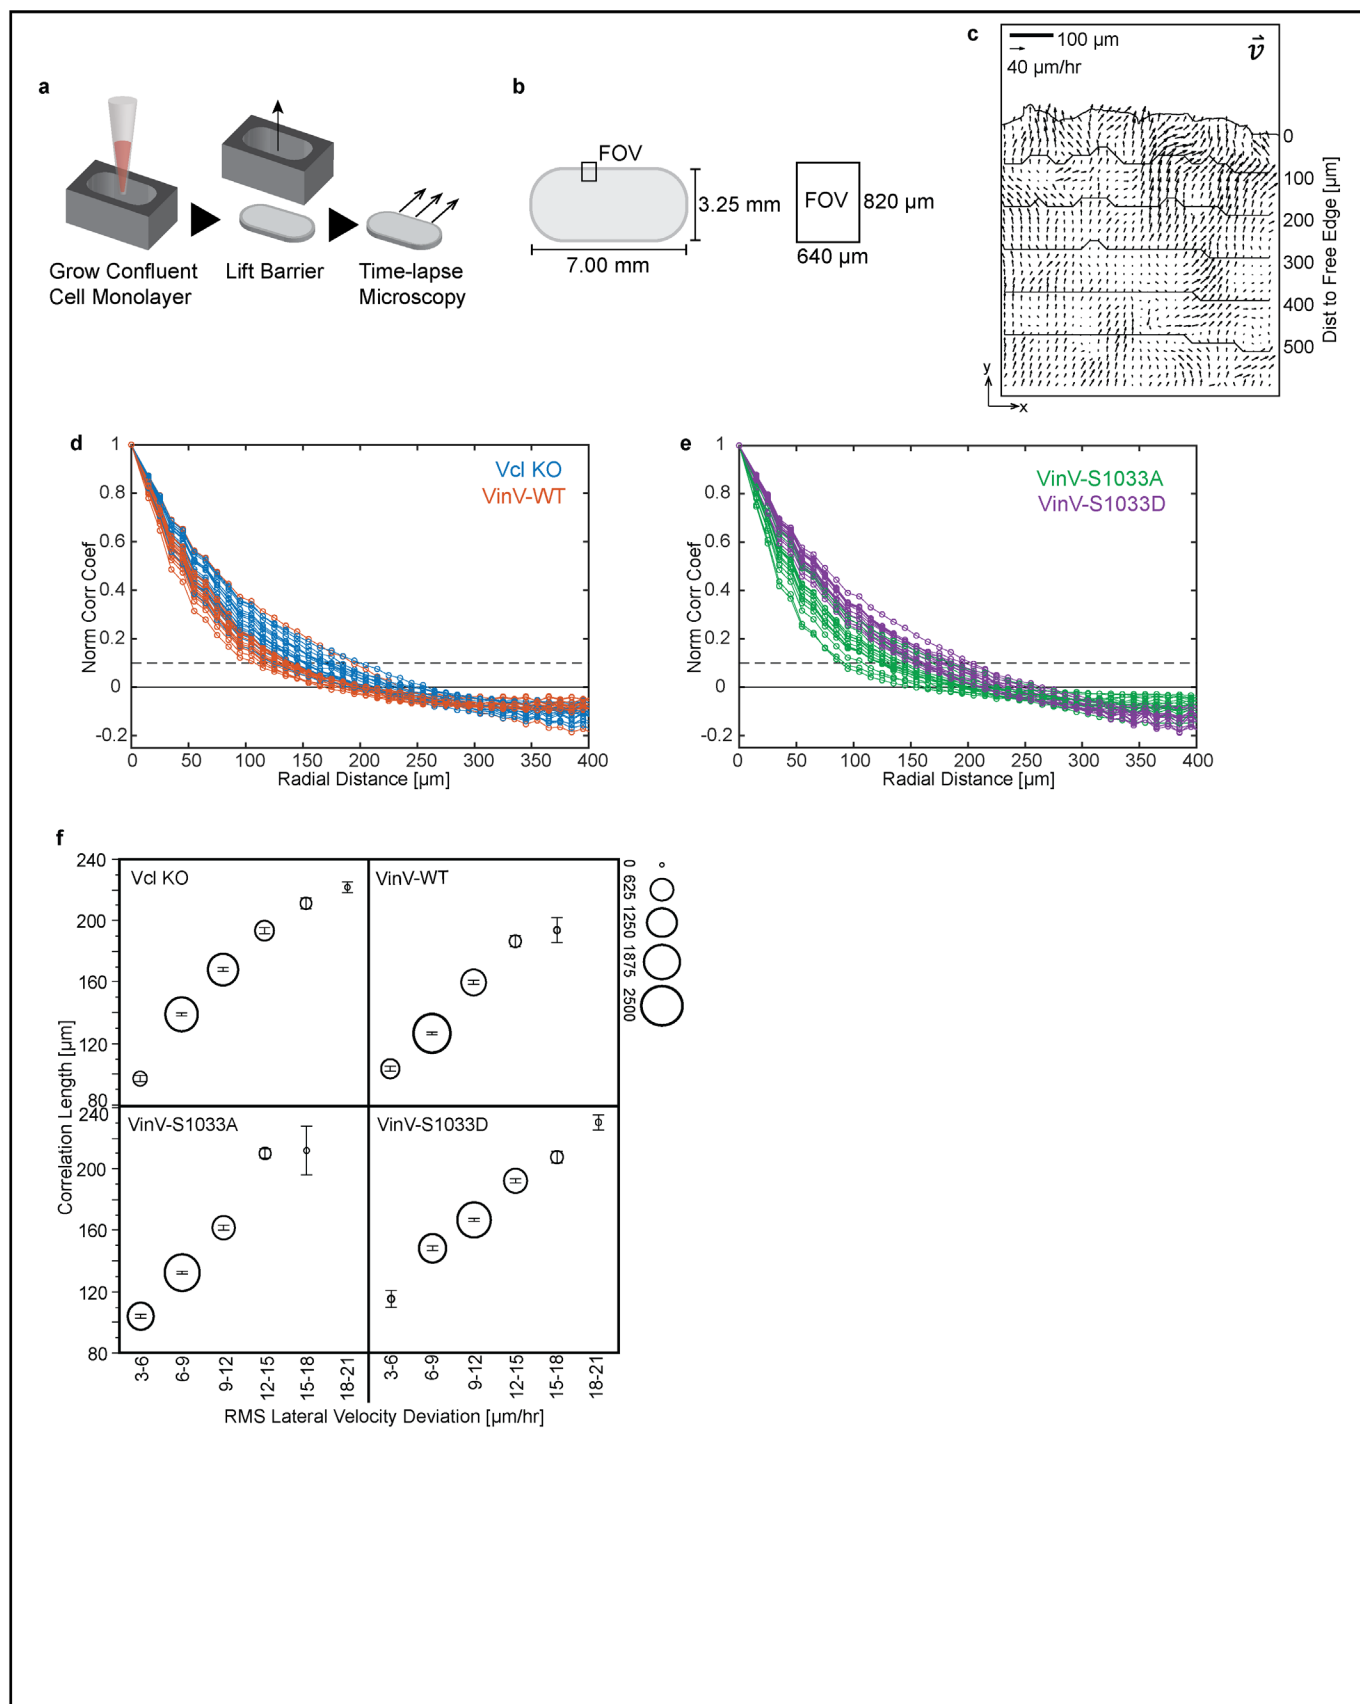

Source: https://www.biorxiv.org/content/10.1101/2023.01.13.523997v1.full.pdf
